# Supplementary material for: Site-selective Cp*Rh(iii)-catalyzed C–H amination of indolines with anthranils
Source: Royal Society of Chemistry journal article supplement (doi:10.1039/c6qo00714g), 2016-11-29

## Supplementary Information

### Site-Selective Cp\*Rh(III)-Catalyzed C–H Amination of Indolines with Anthranils

Neeraj Kumar Mishra,<sup>†</sup> Mijin Jeon,<sup>†</sup> Yongguk Oh, Hyeim Jo, Jihye Park, Sangil Han,  
Satyasheel Sharma, Sang Hoon Han, Young Hoon Jung and In Su Kim\*

*School of Pharmacy, Sungkyunkwan University, Suwon 16419, Republic of Korea*

\* Corresponding author.

Tel.: +82-31-290-7788; fax: +82-31-292-8800; e-mail: [insukim@skku.edu](mailto:insukim@skku.edu) (I. S. Kim)

<sup>†</sup> These authors equally contributed.

#### List of the Contents

<sup>1</sup>H NMR and <sup>13</sup>C NMR spectra of all compounds ----- S2–S31

# $^1\text{H}$ and $^{13}\text{C}$ NMR Spectra of all compounds

SpinWorks 4: NK-1087

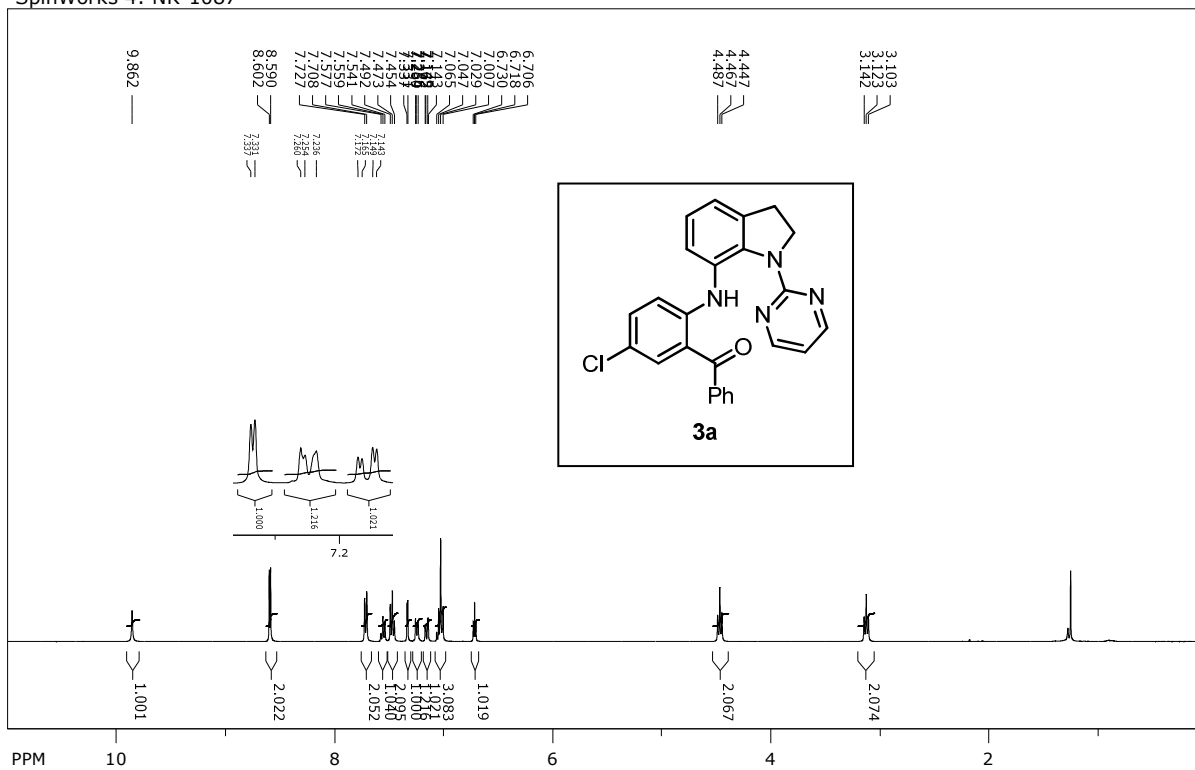

SpinWorks 4: NK-1087

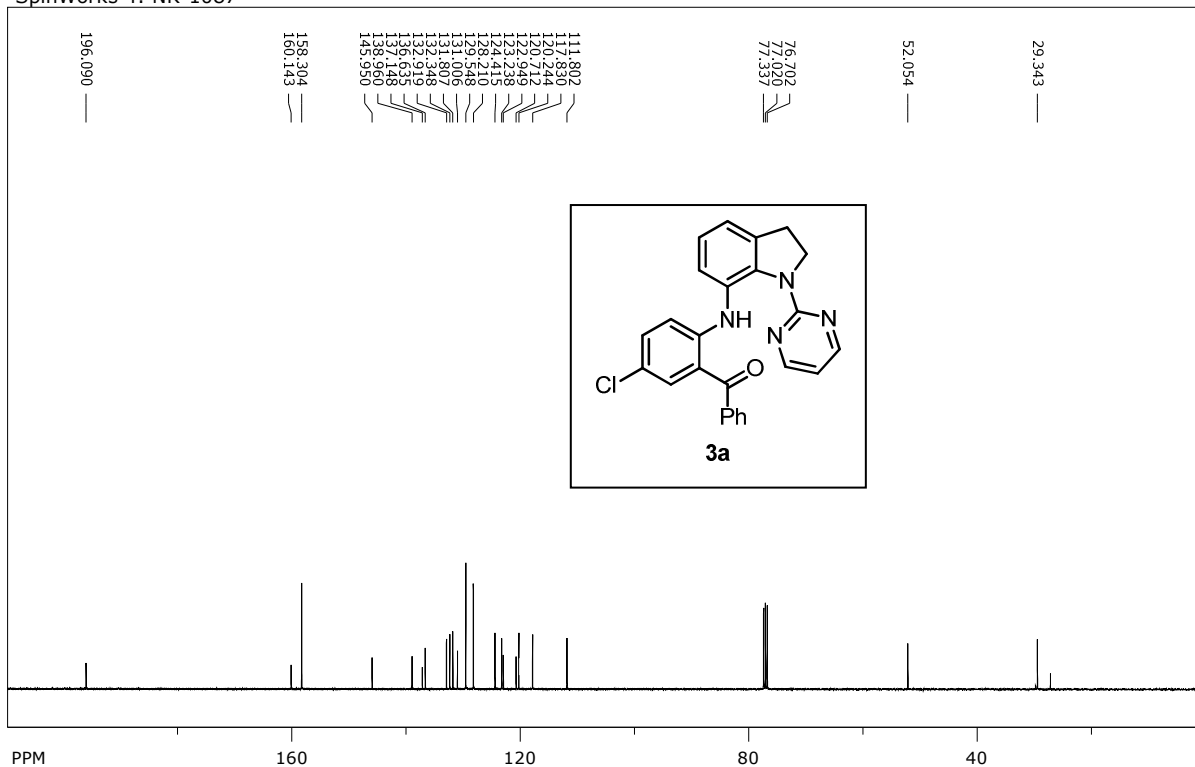

## SpinWorks 4: NK-1136 (P)

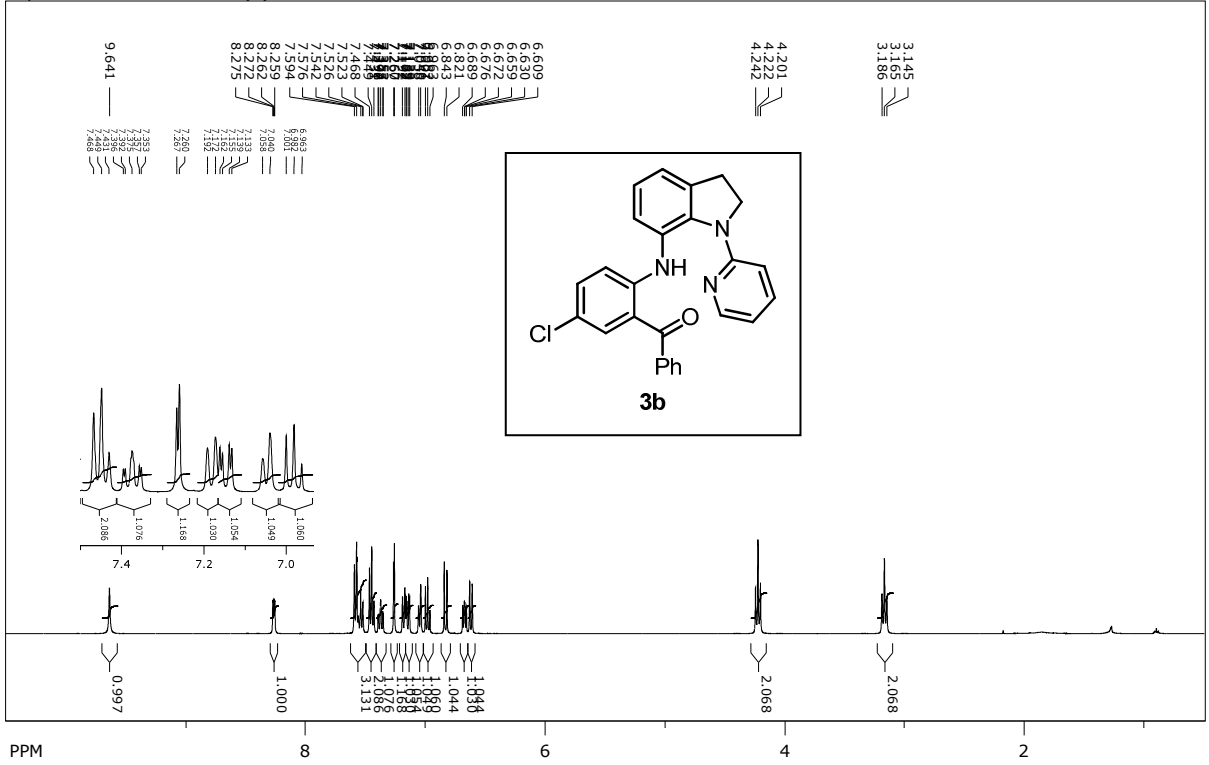

## SpinWorks 4: NK-1136 (P)

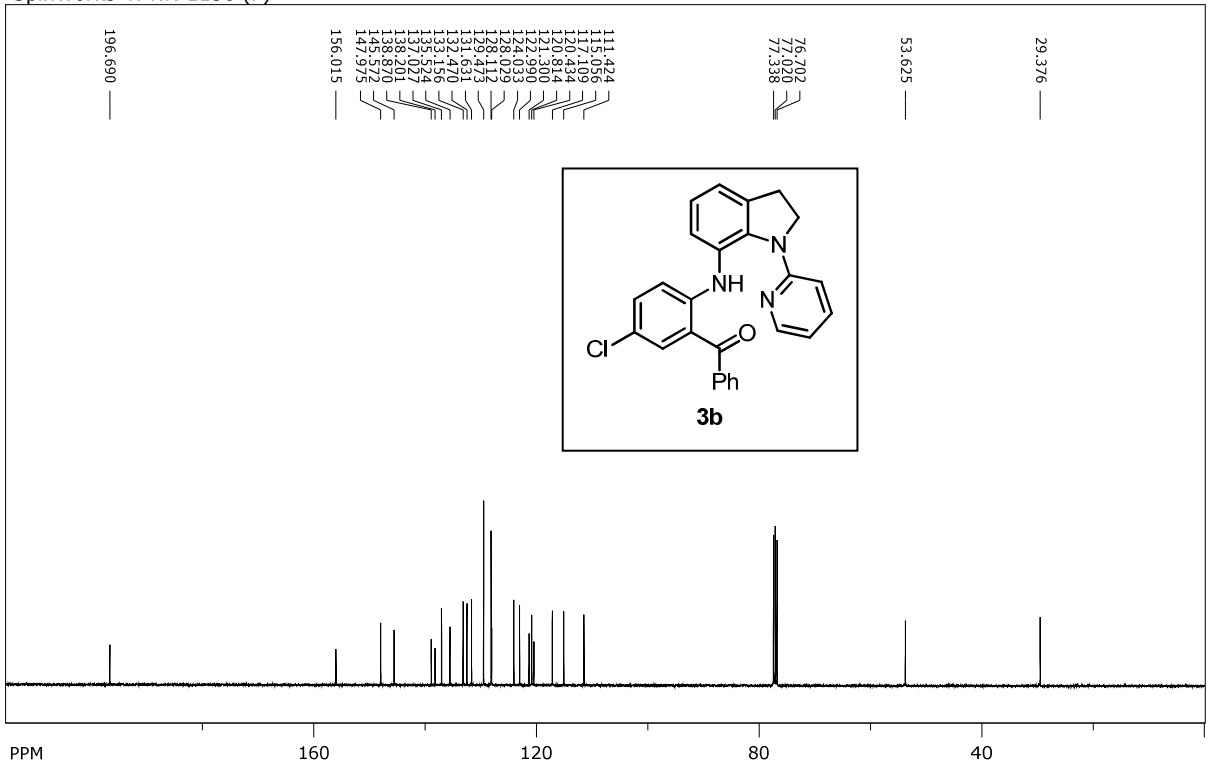

SpinWorks 4: NK-1150

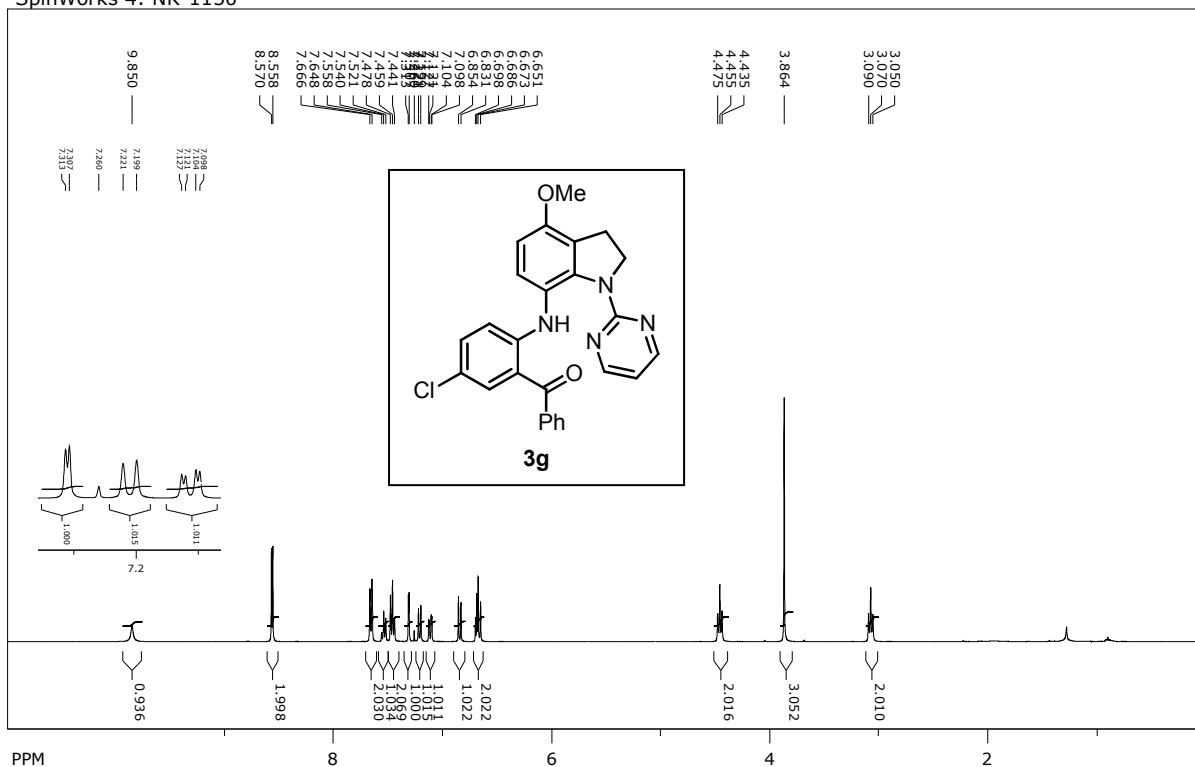

SpinWorks 4: NK-1150

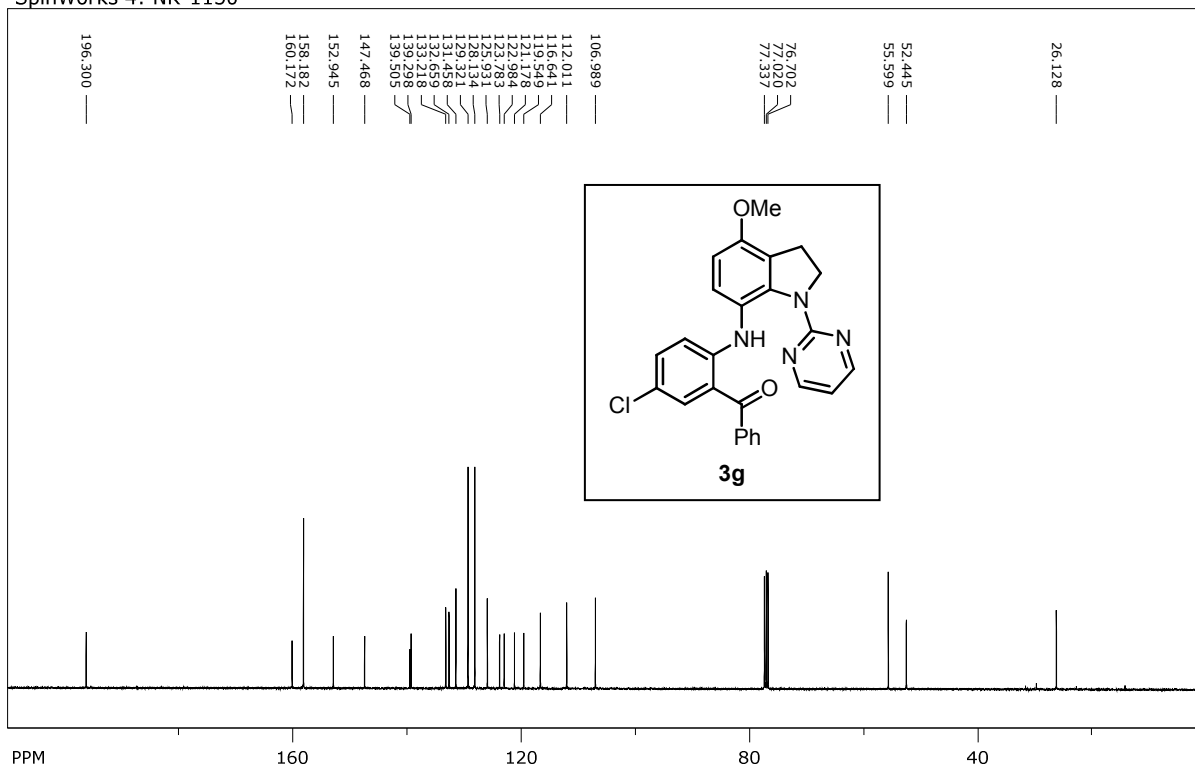

SpinWorks 4: NK-1149

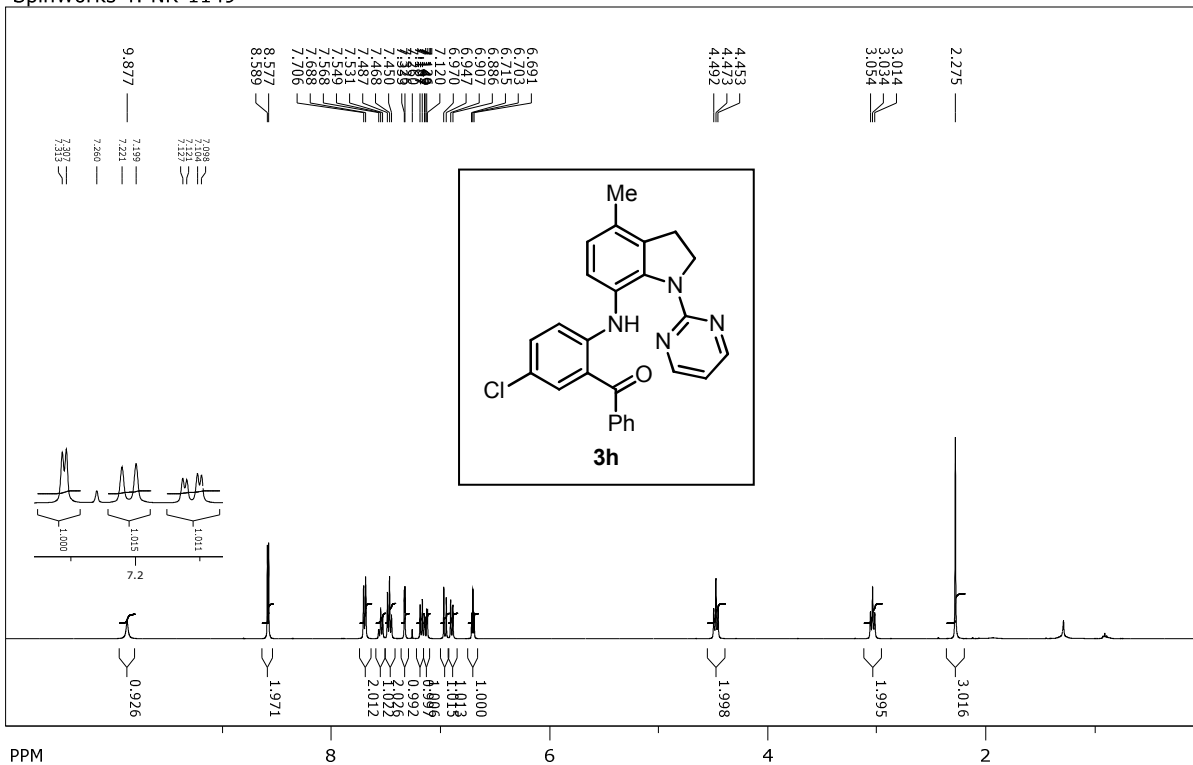

SpinWorks 4:

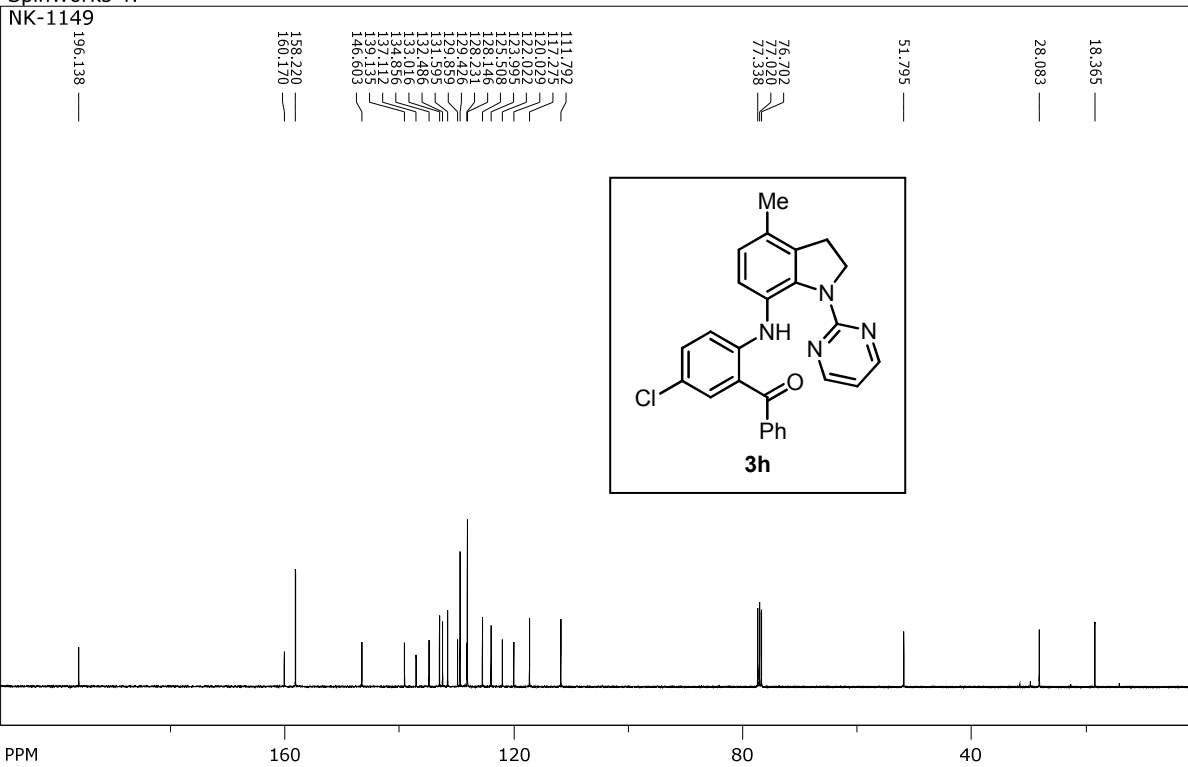

SpinWorks 4: NK-1159

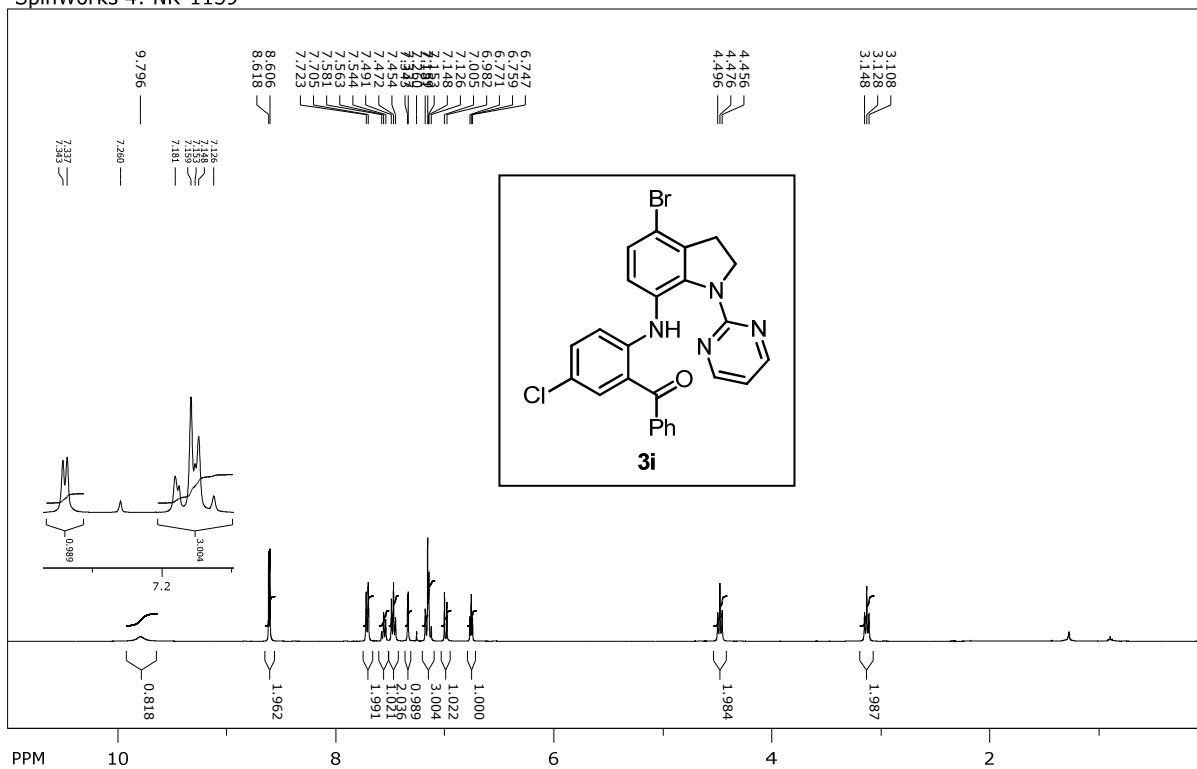

SpinWorks 4: NK-1159

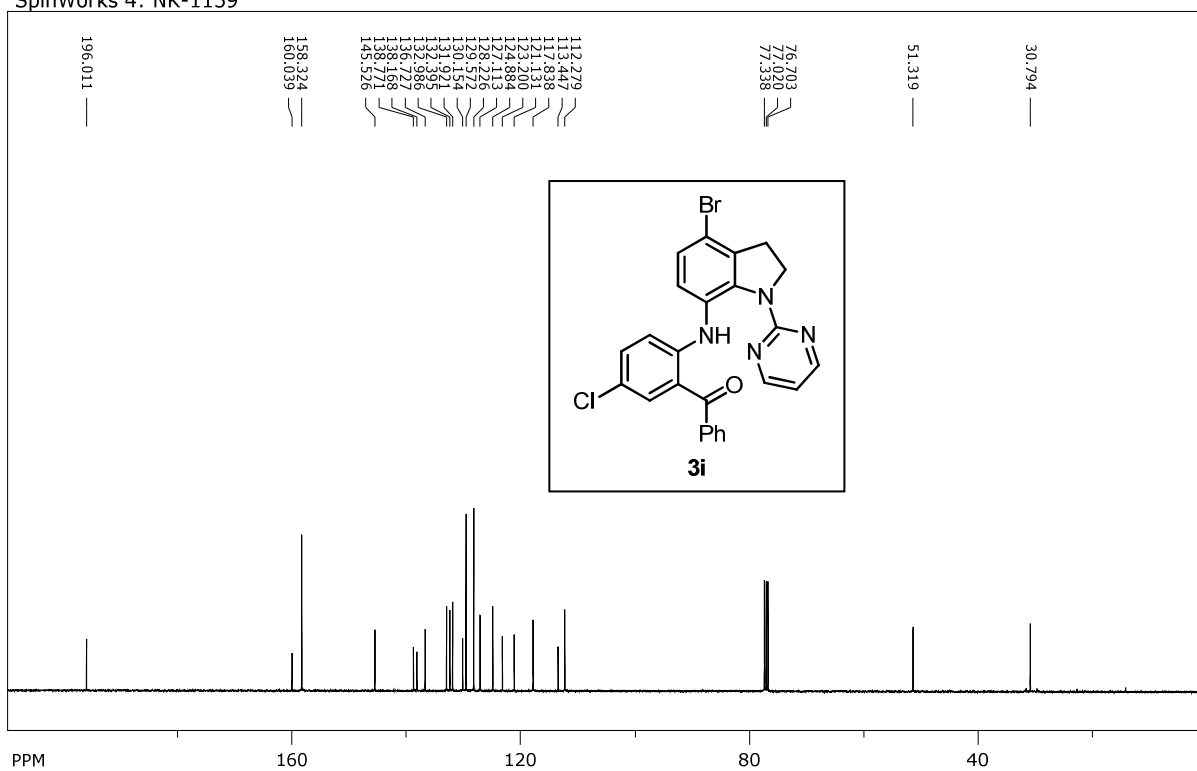

SpinWorks 4: NK-1152

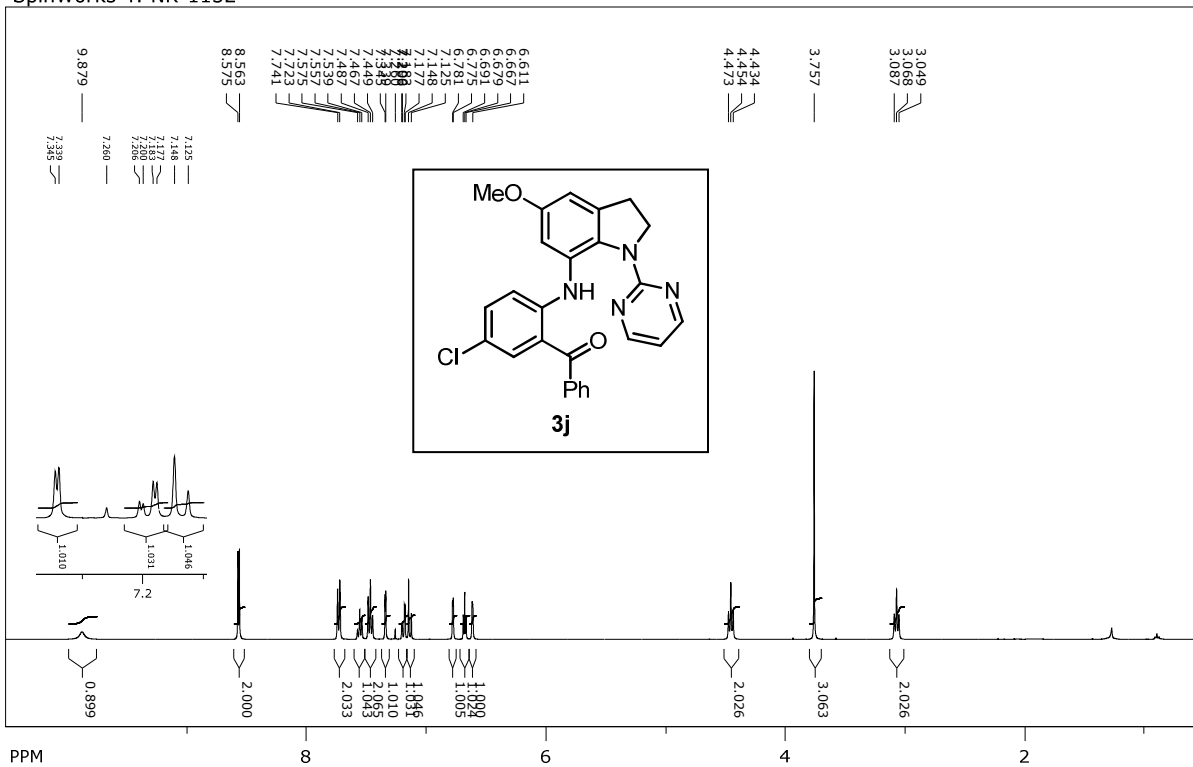

SpinWorks 4: NK-1152

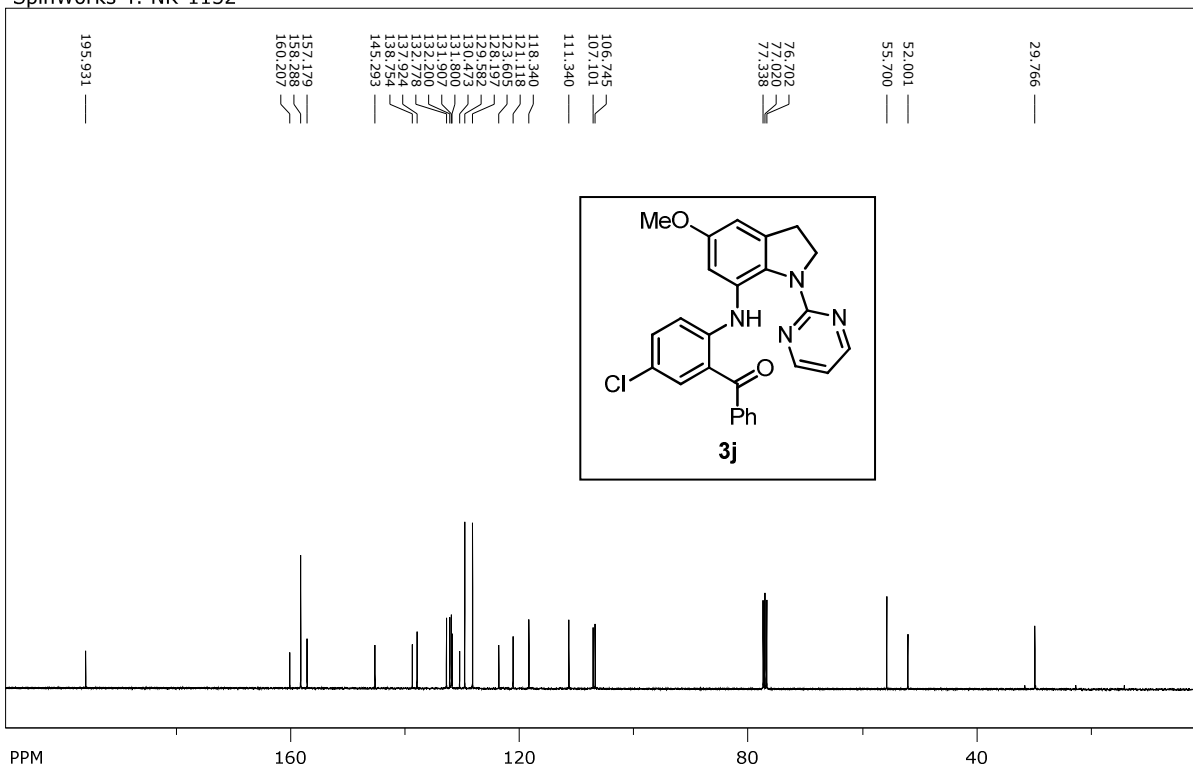

SpinWorks 4:  
NK-1151

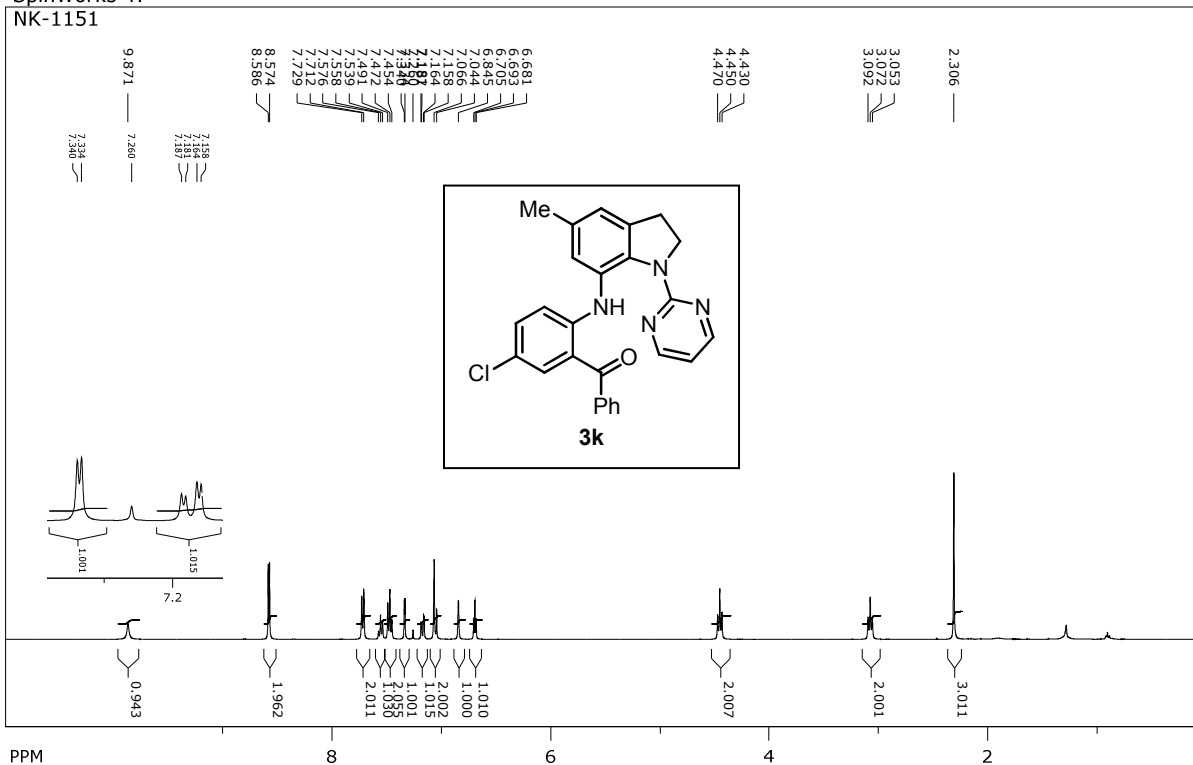

SpinWorks 4: NK-1151

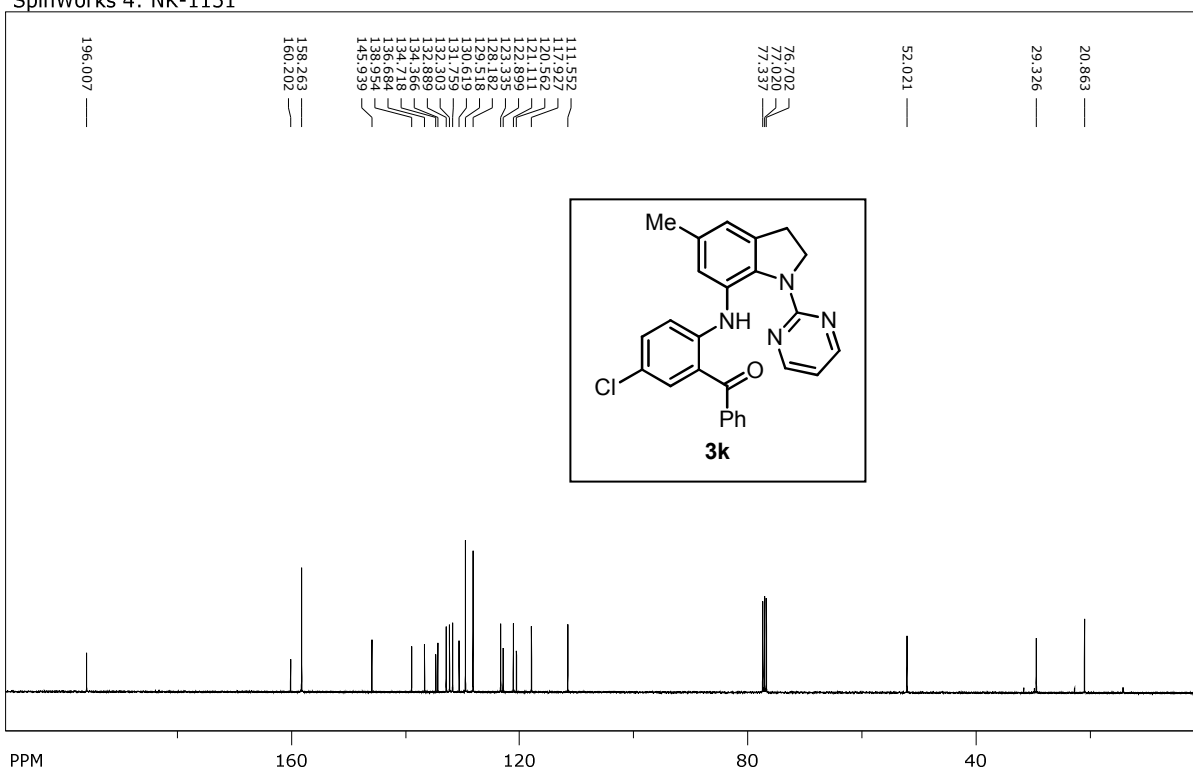



SpinWorks 4:

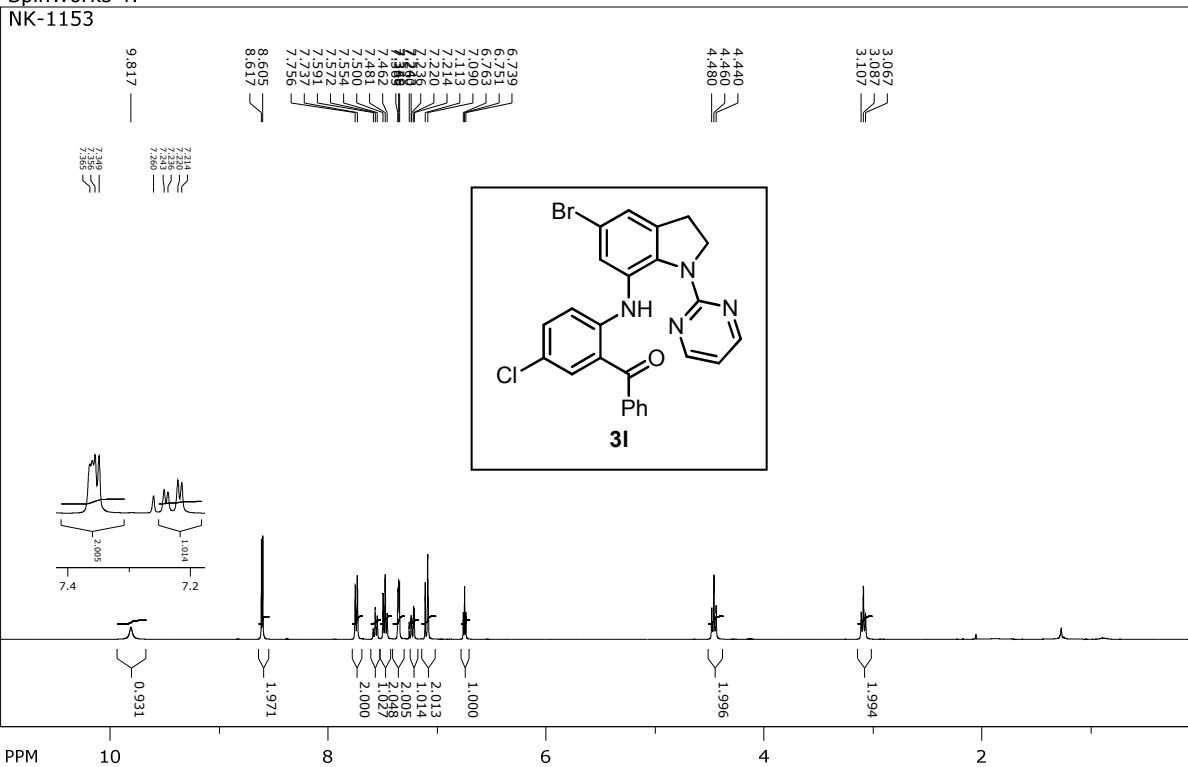

SpinWorks 4:

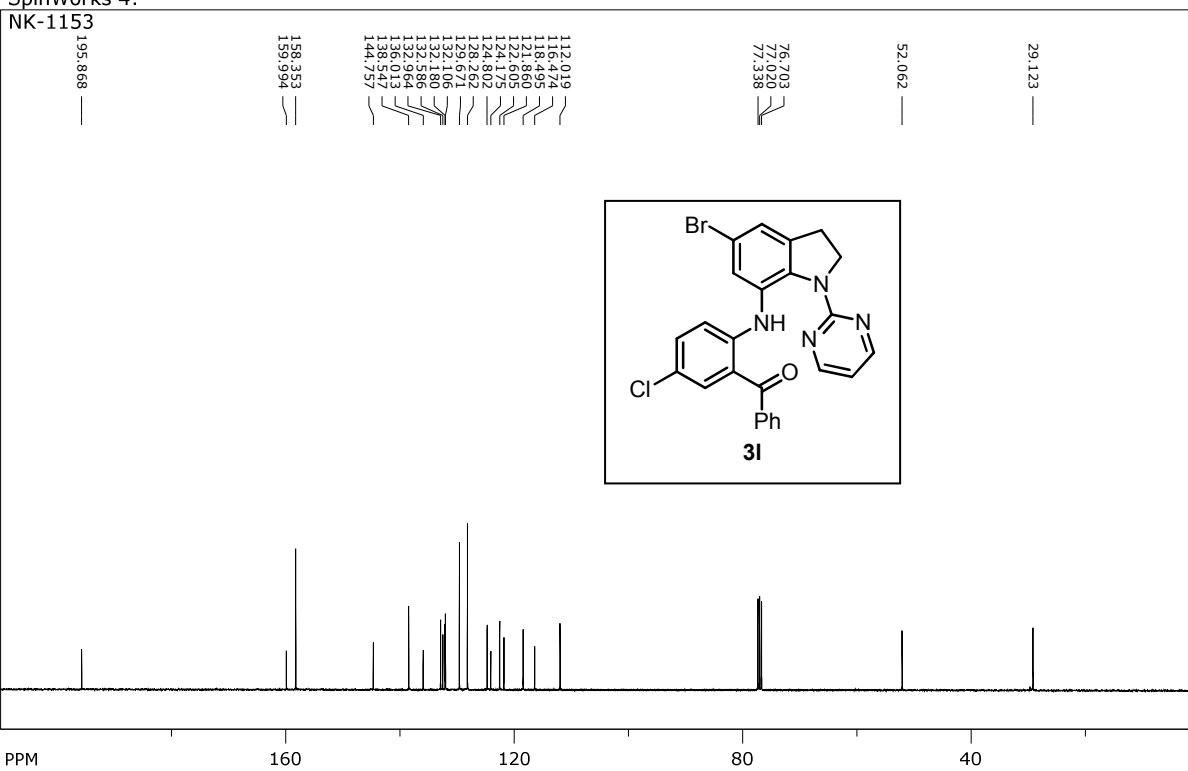

SpinWorks 4: NK-1171

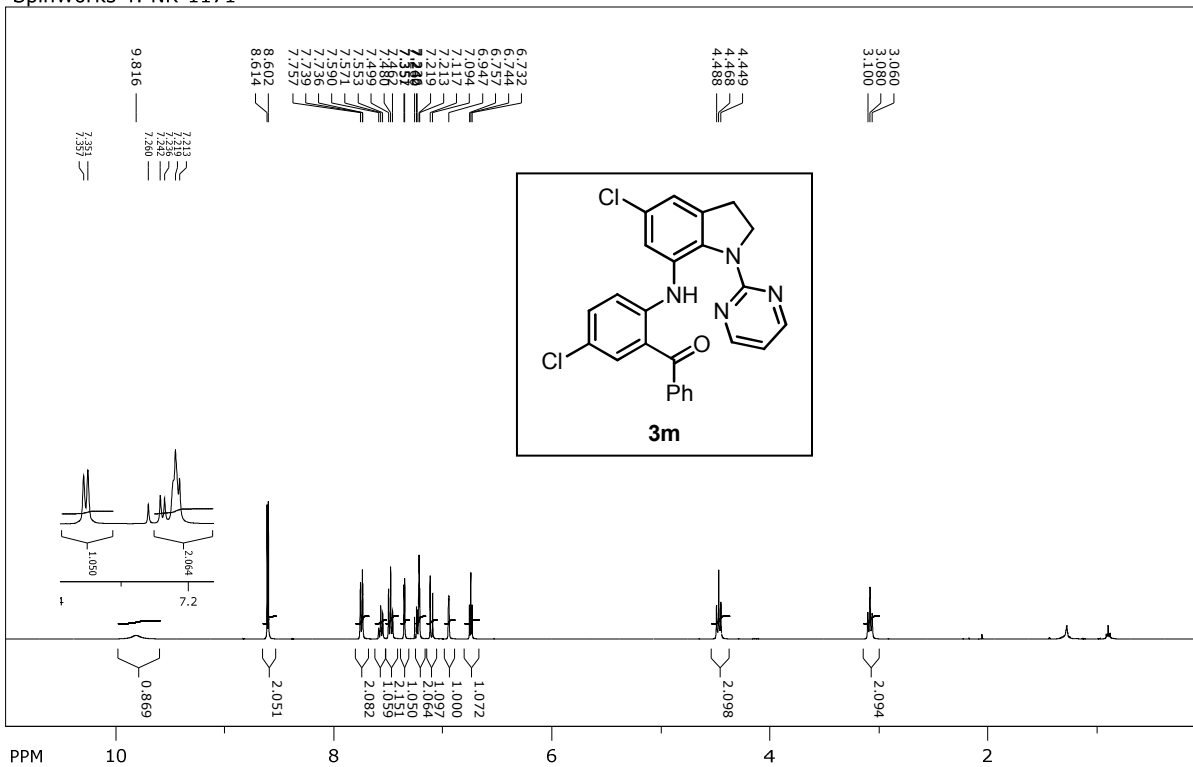

SpinWorks 4: NK-1171

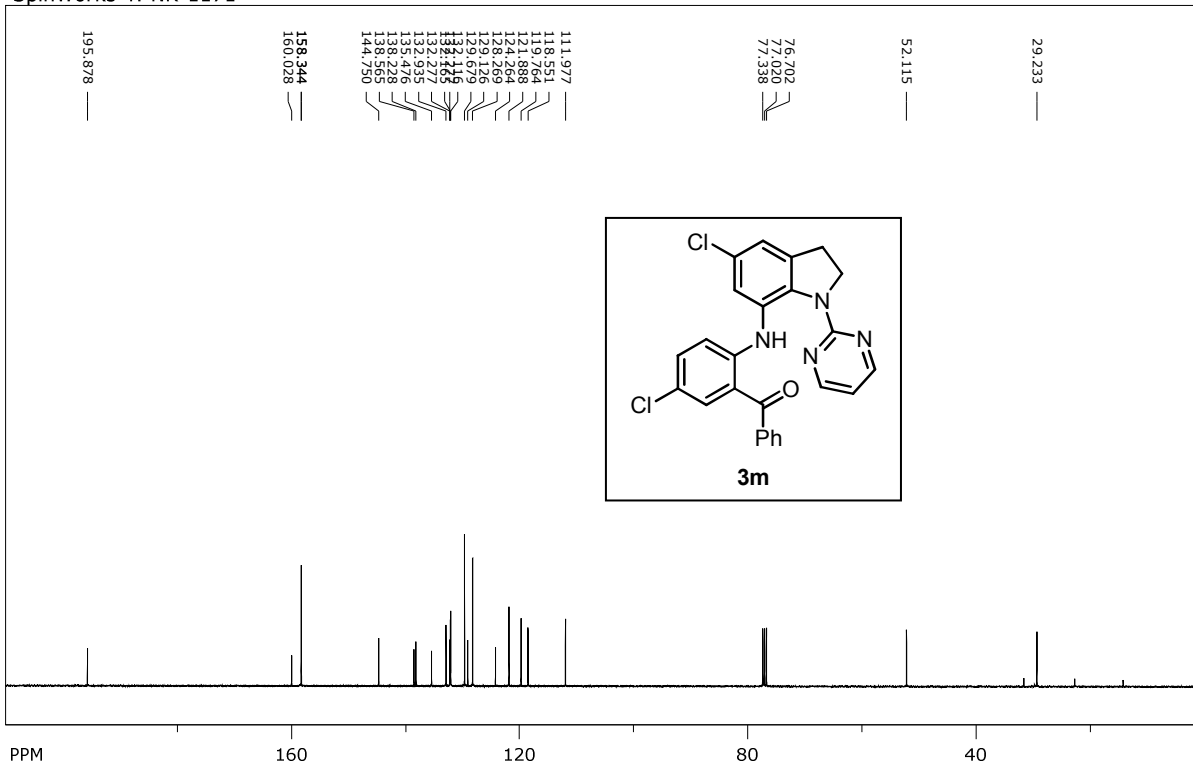

## SpinWorks 4: NK-1173

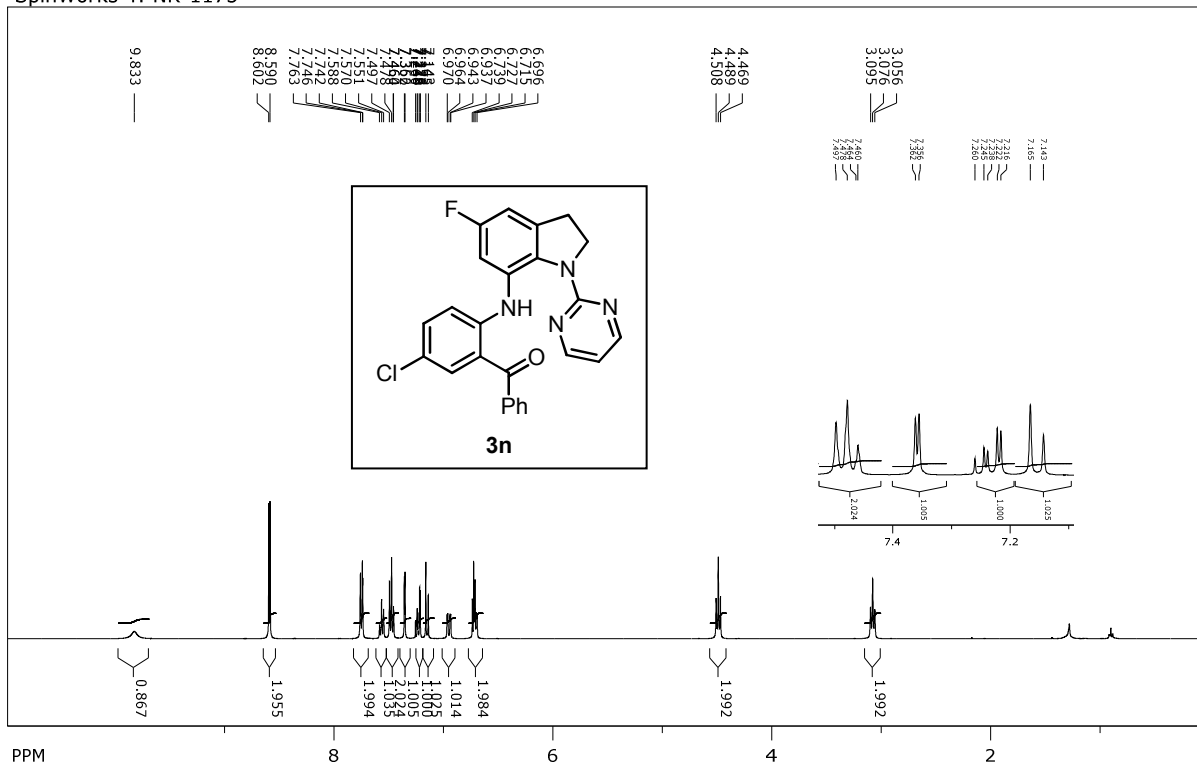

## SpinWorks 4: NK-1173

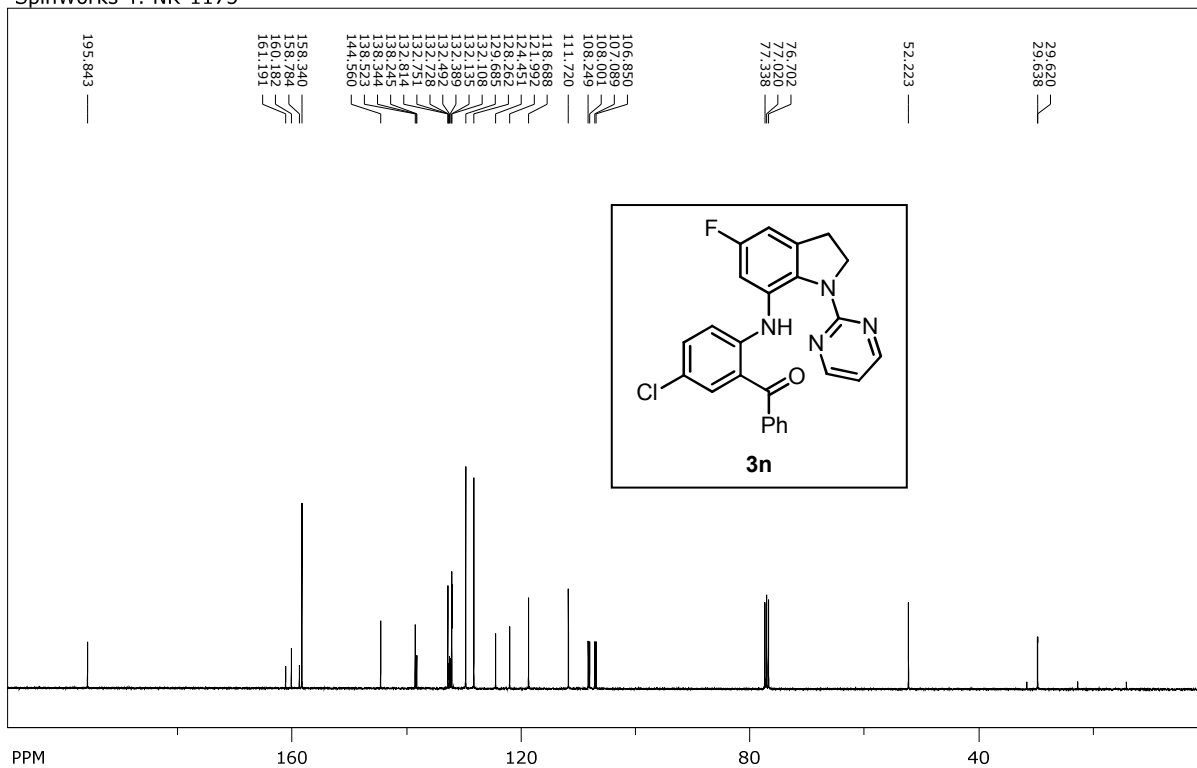

SpinWorks 4: NK-1175

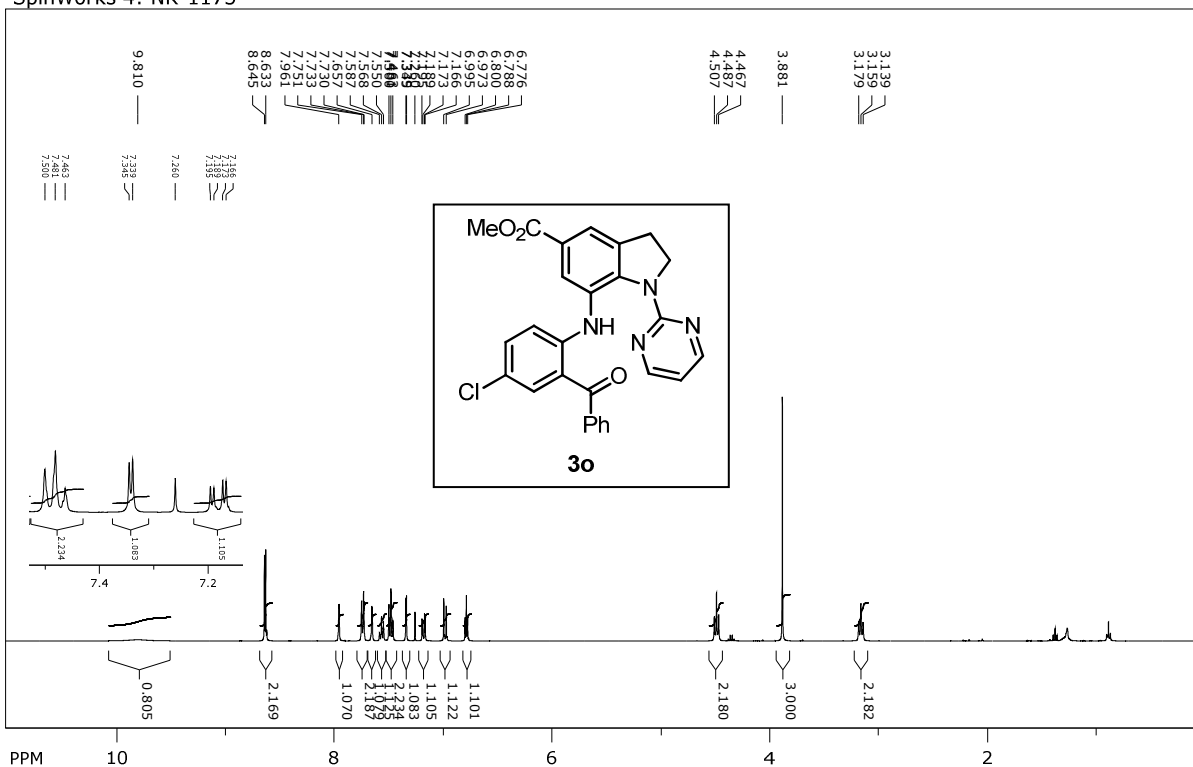

SpinWorks 4: NK-1175

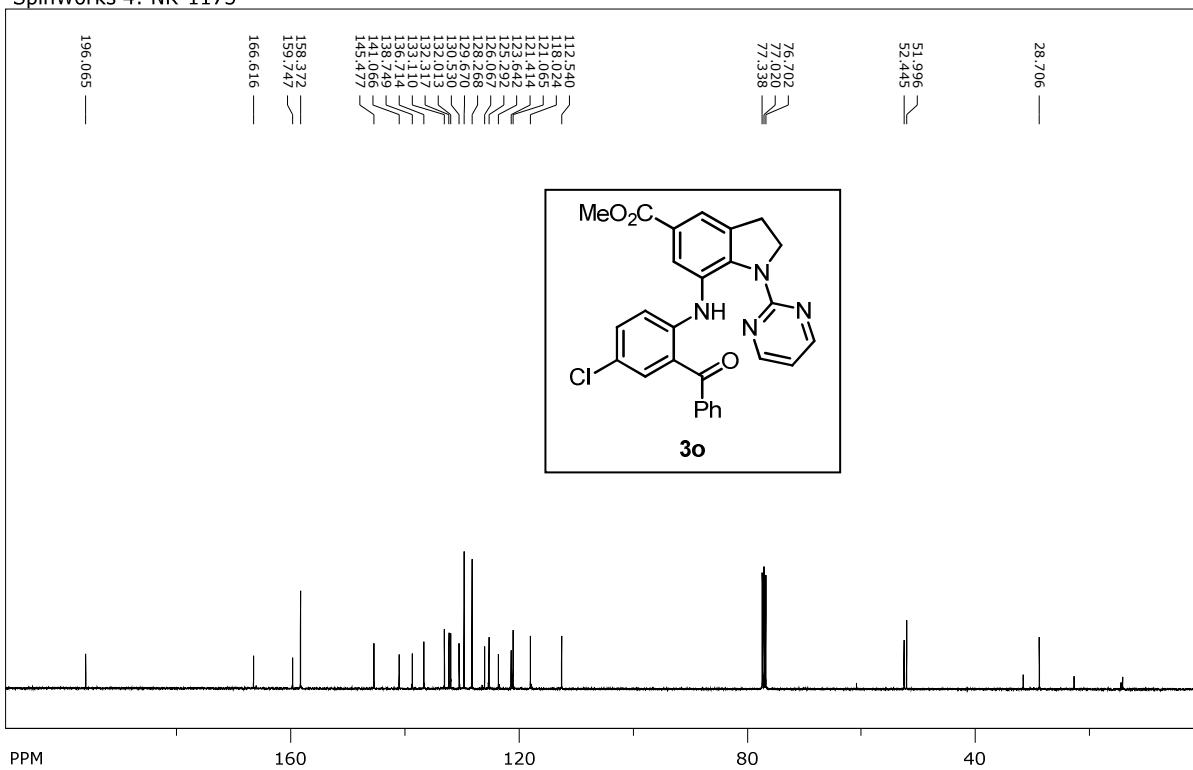



SpinWorks 4:  
NK-1155

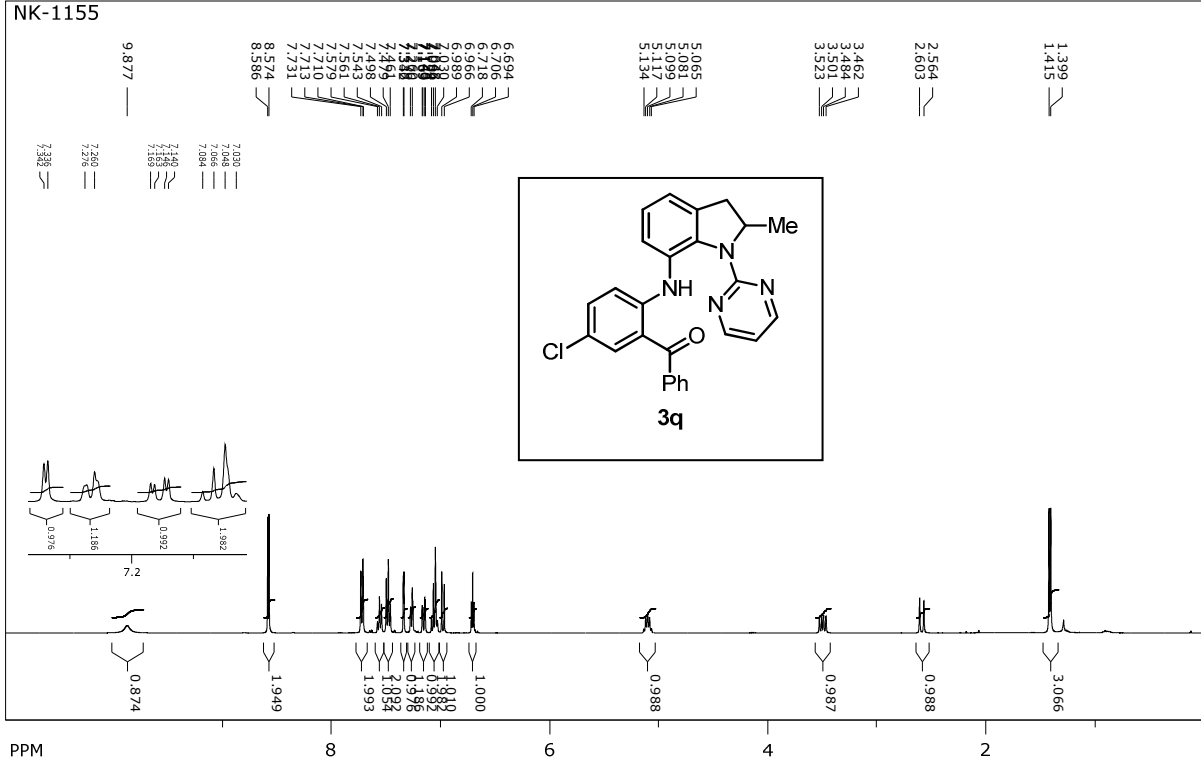

SpinWorks 4: NK-1155

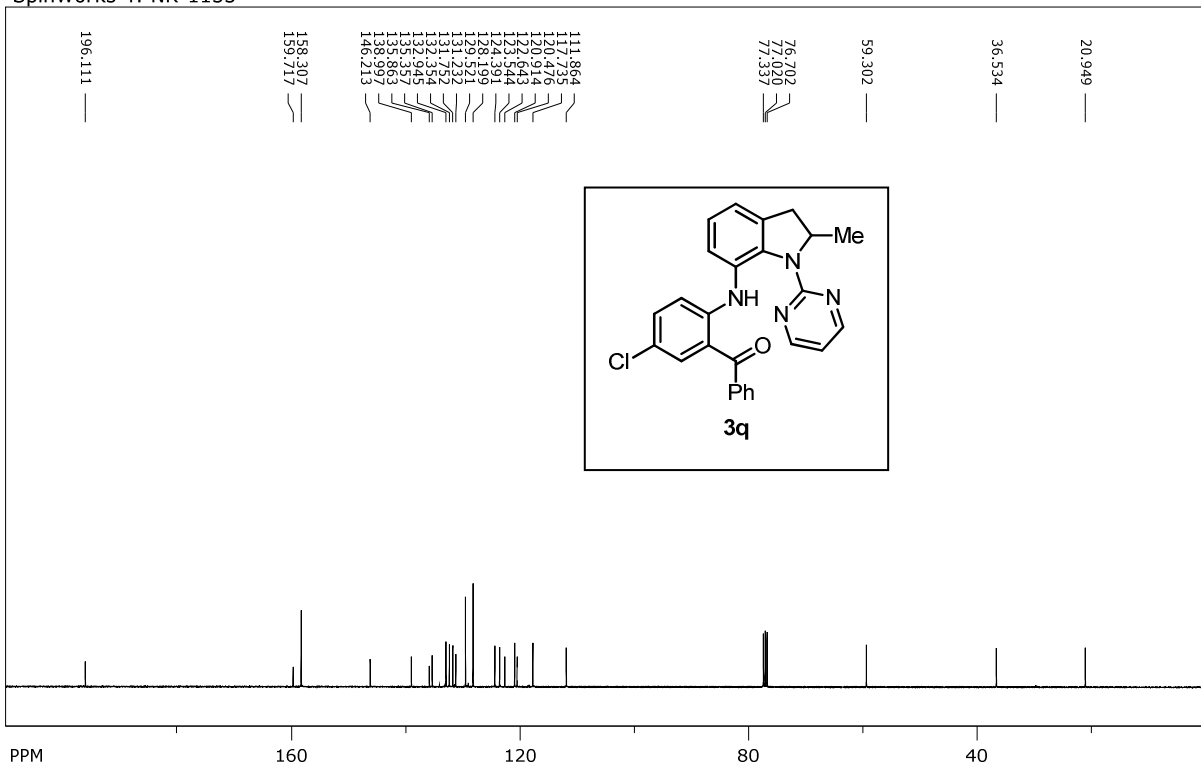

SpinWorks 4: NK-1166

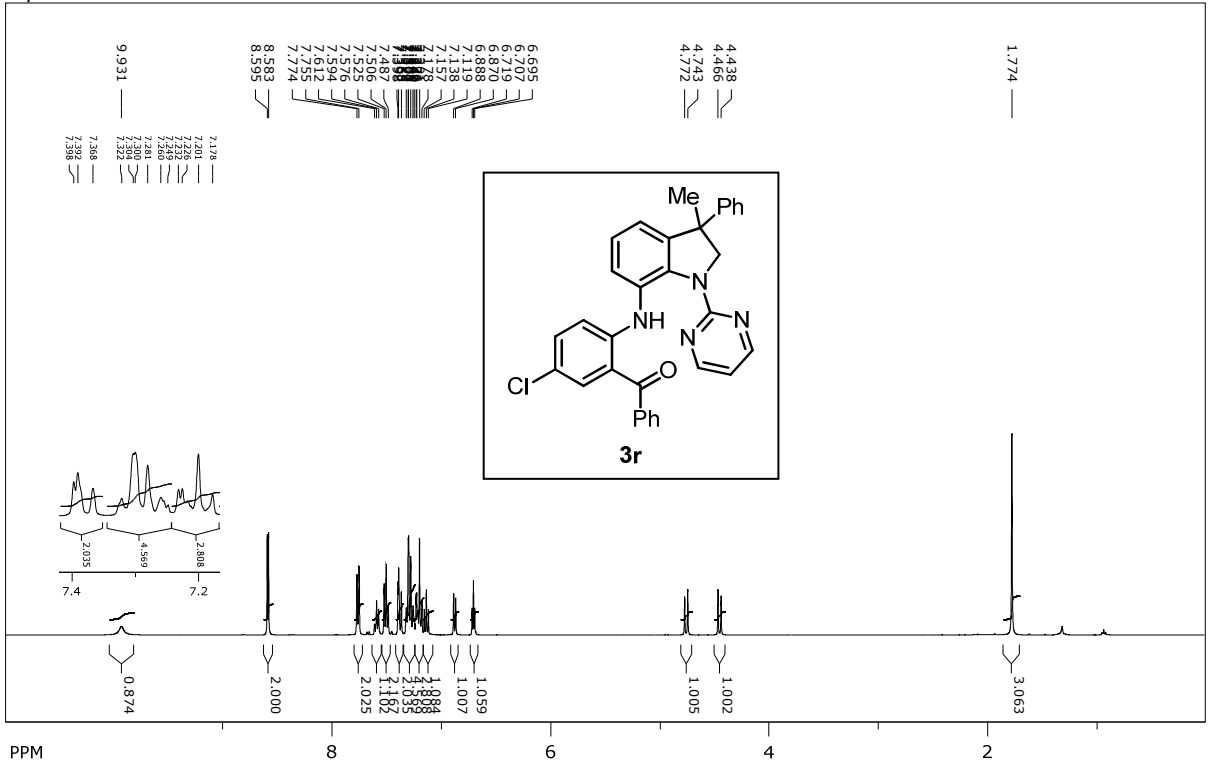

SpinWorks 4: NK-1166

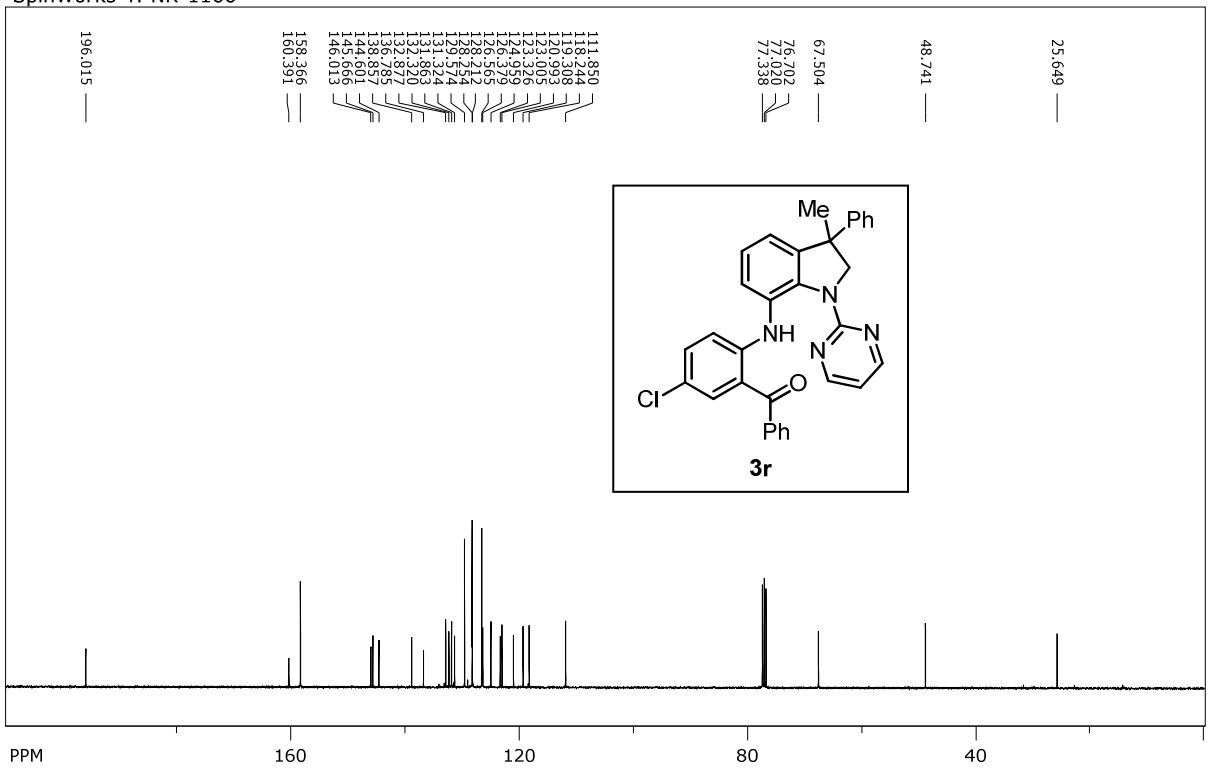

SpinWorks 3: NK.1156

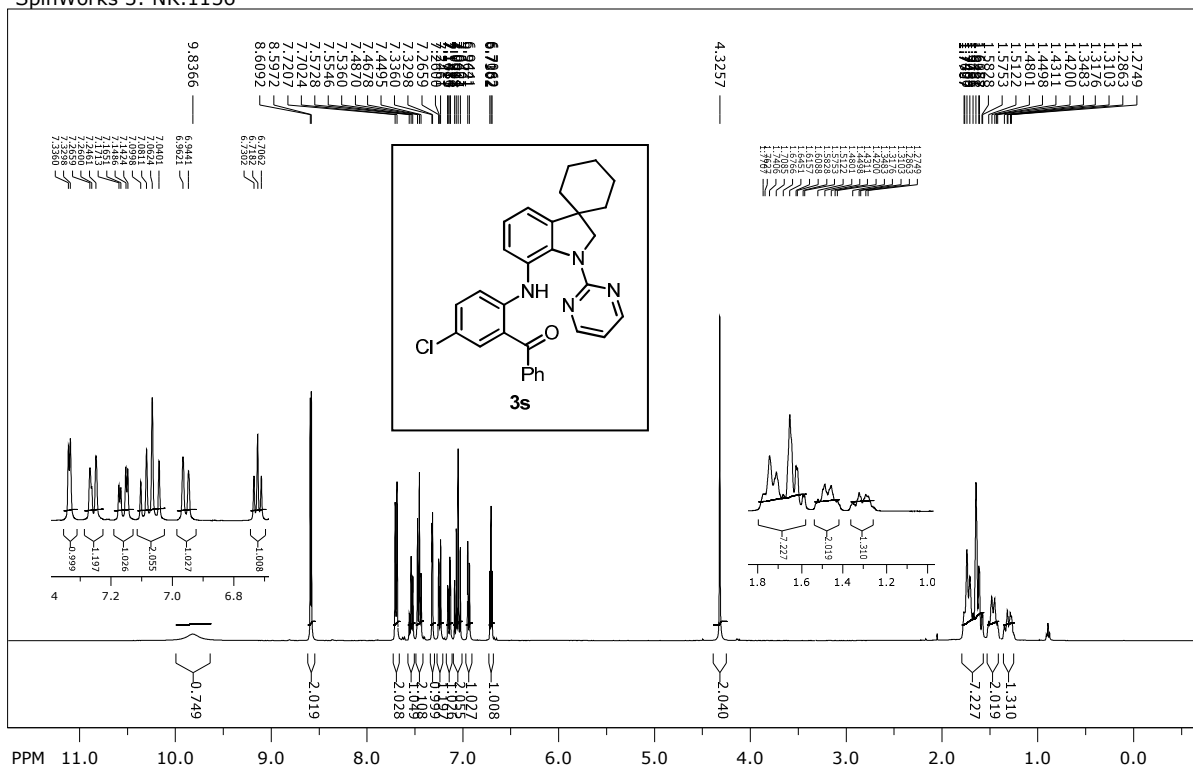

SpinWorks 4:

NK-1156

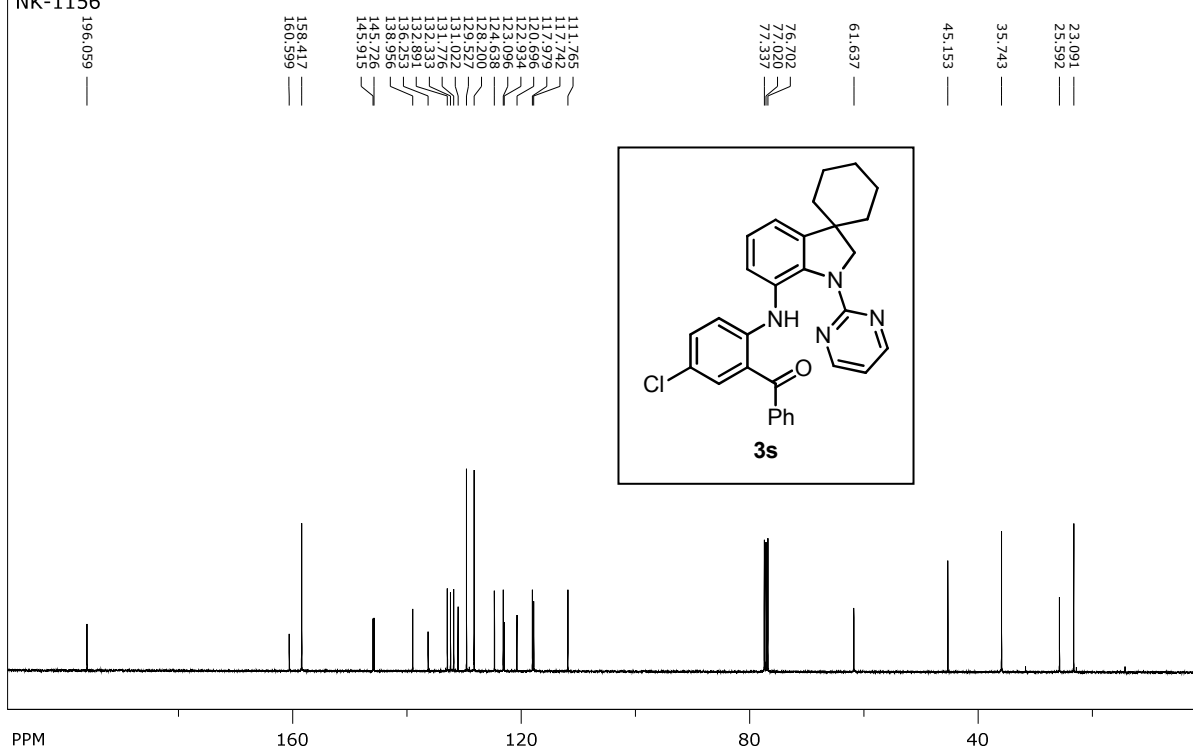



SpinWorks 4: NK-1167

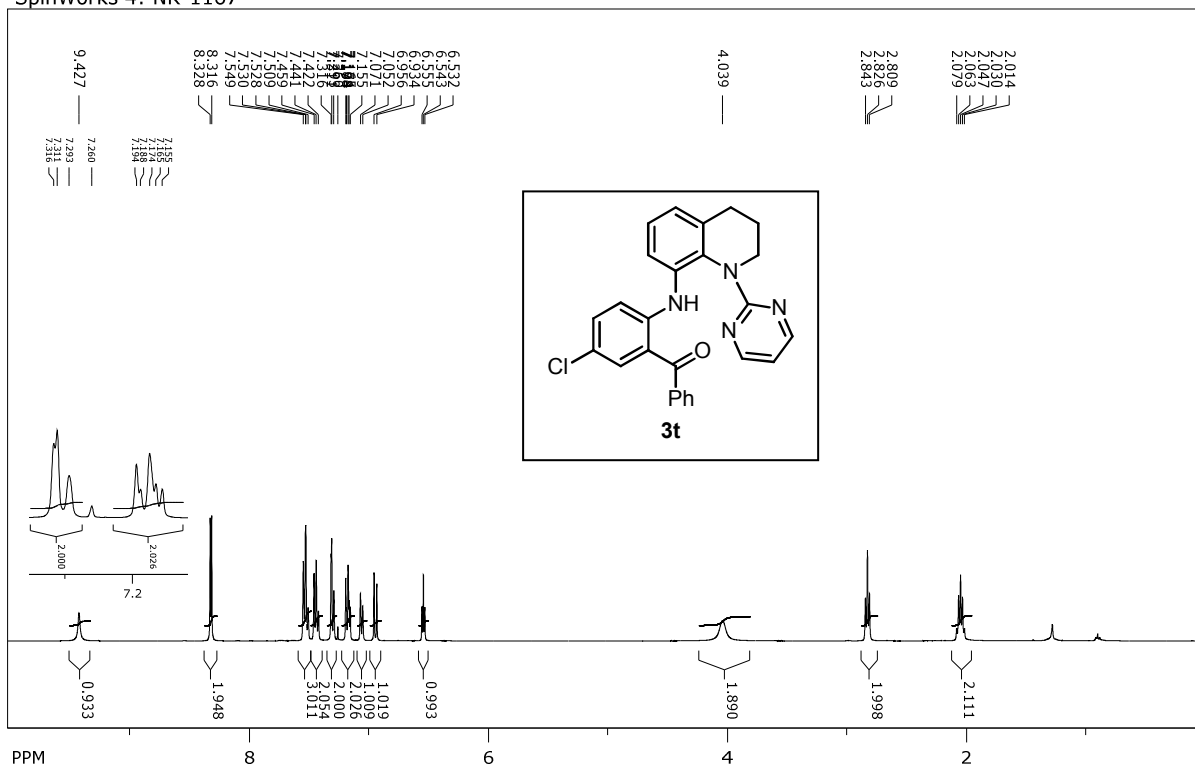

SpinWorks 4: NK-1167

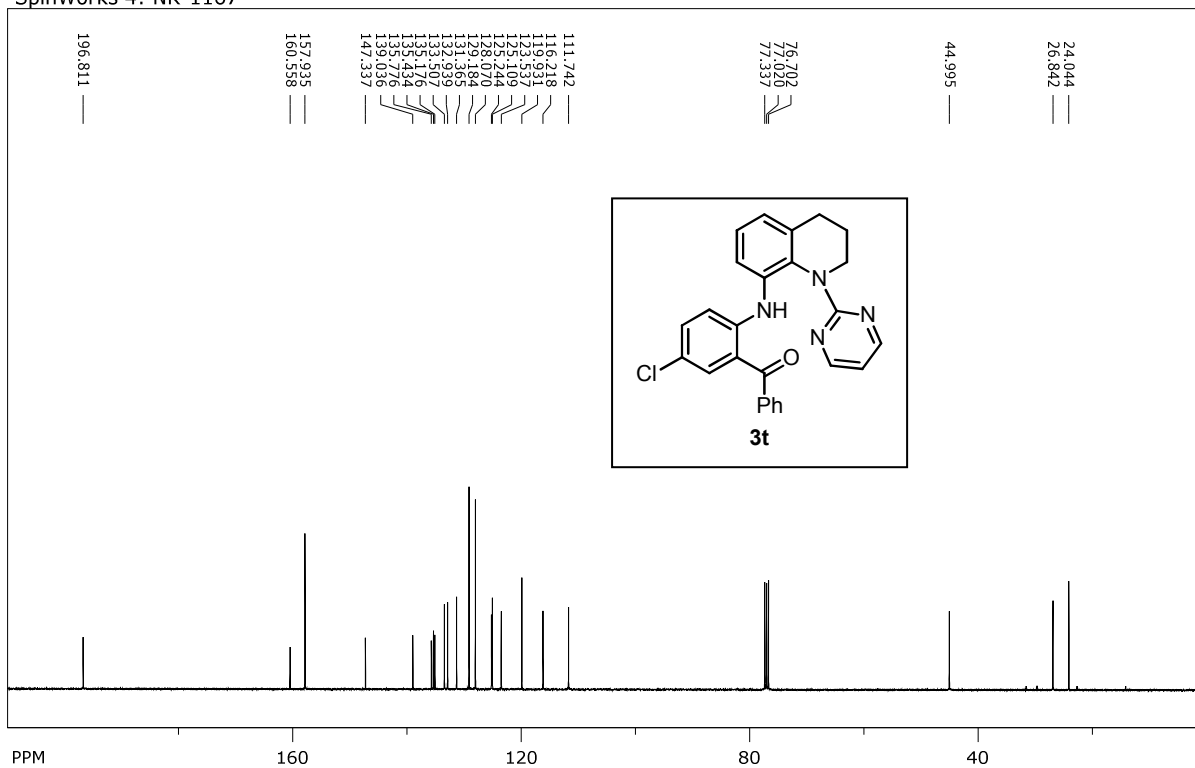

## SpinWorks 4: NK-1161

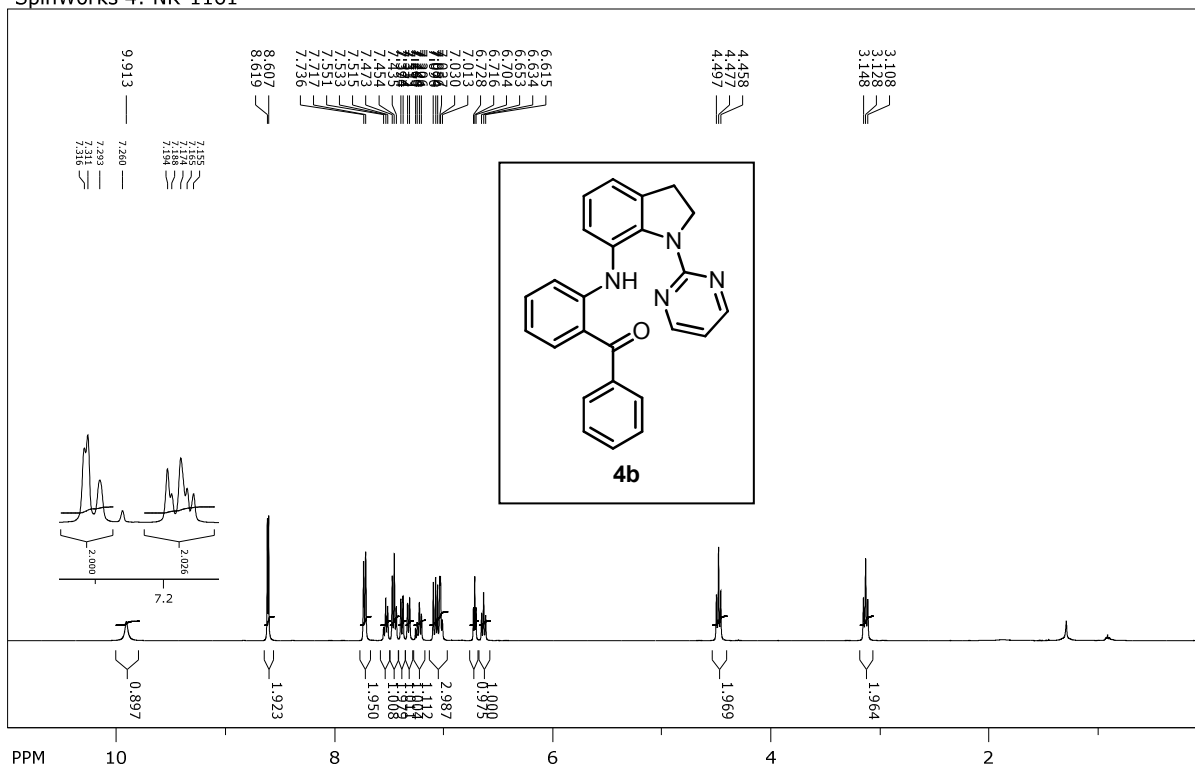

## SpinWorks 4: NK-1161

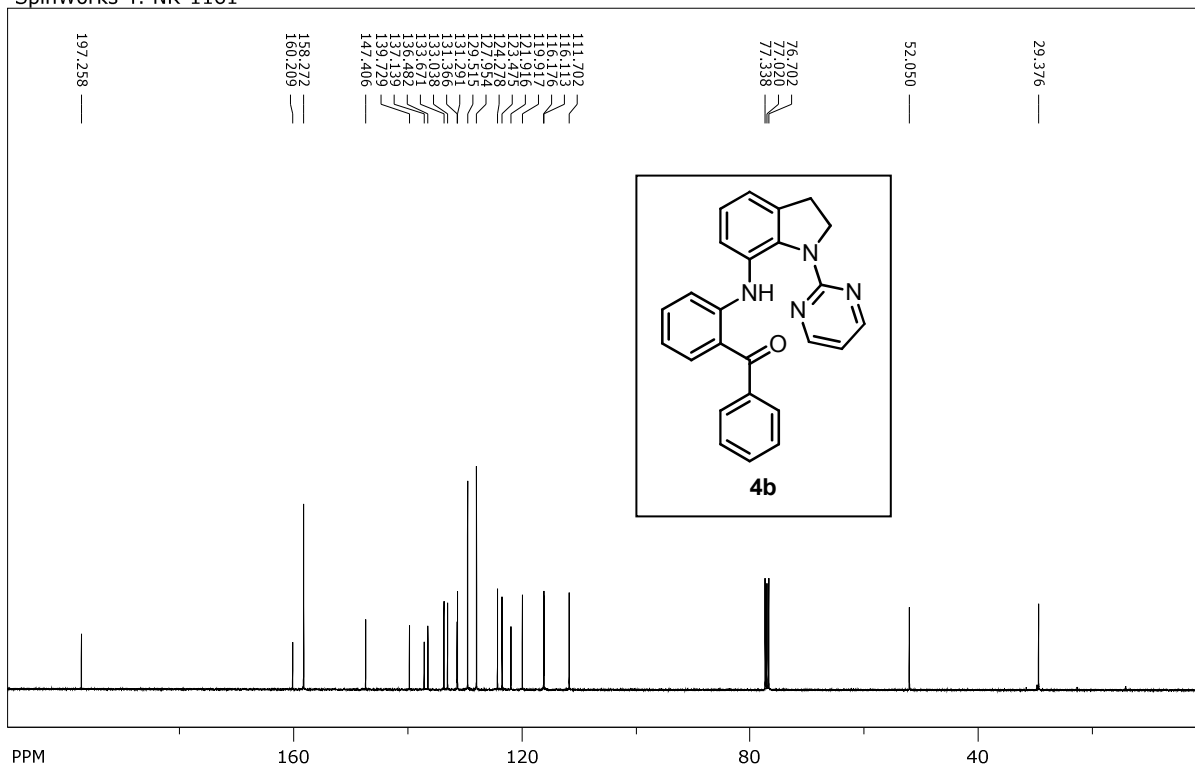

SpinWorks 4: NK-1176

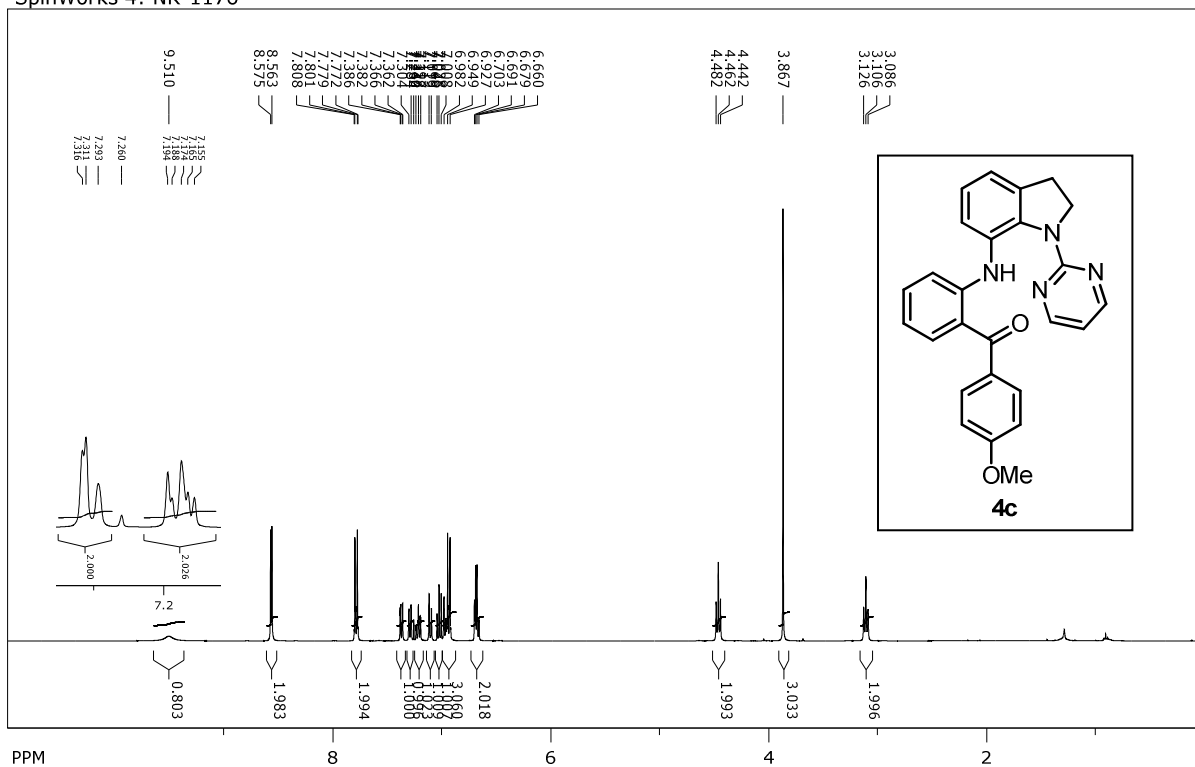

SpinWorks 4: NK-1176

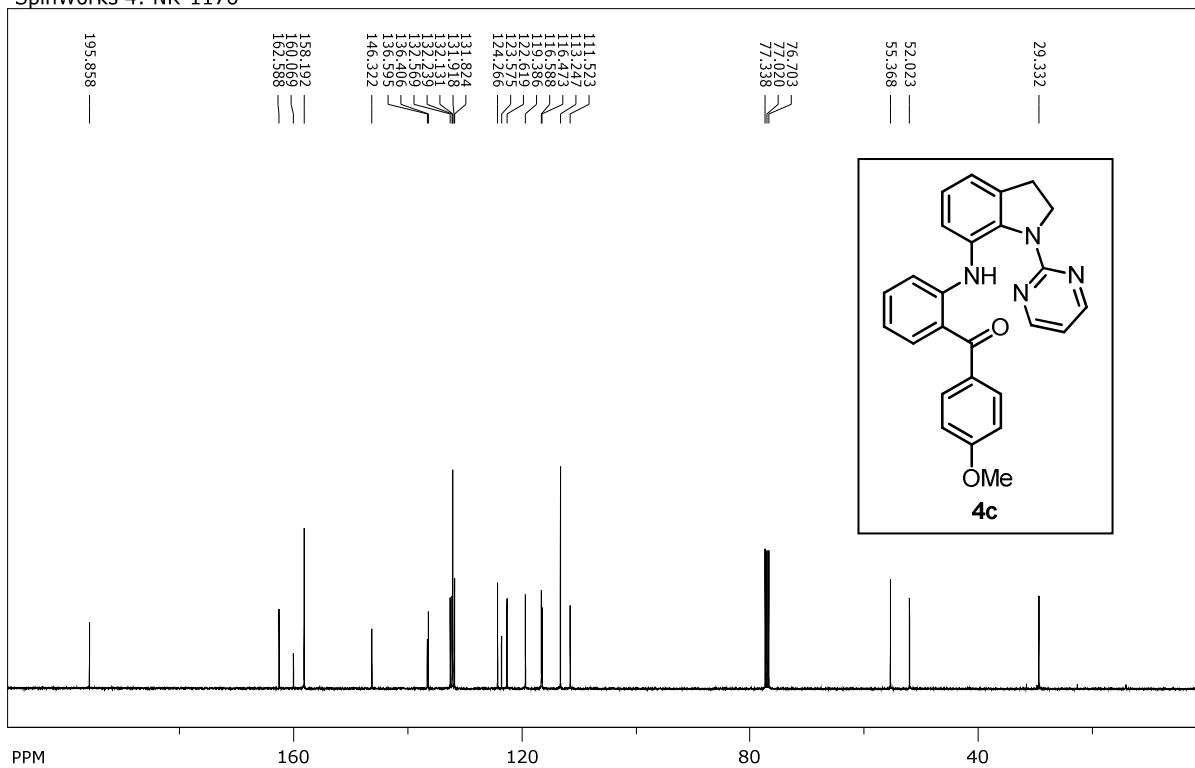

SpinWorks 4: NK-1168

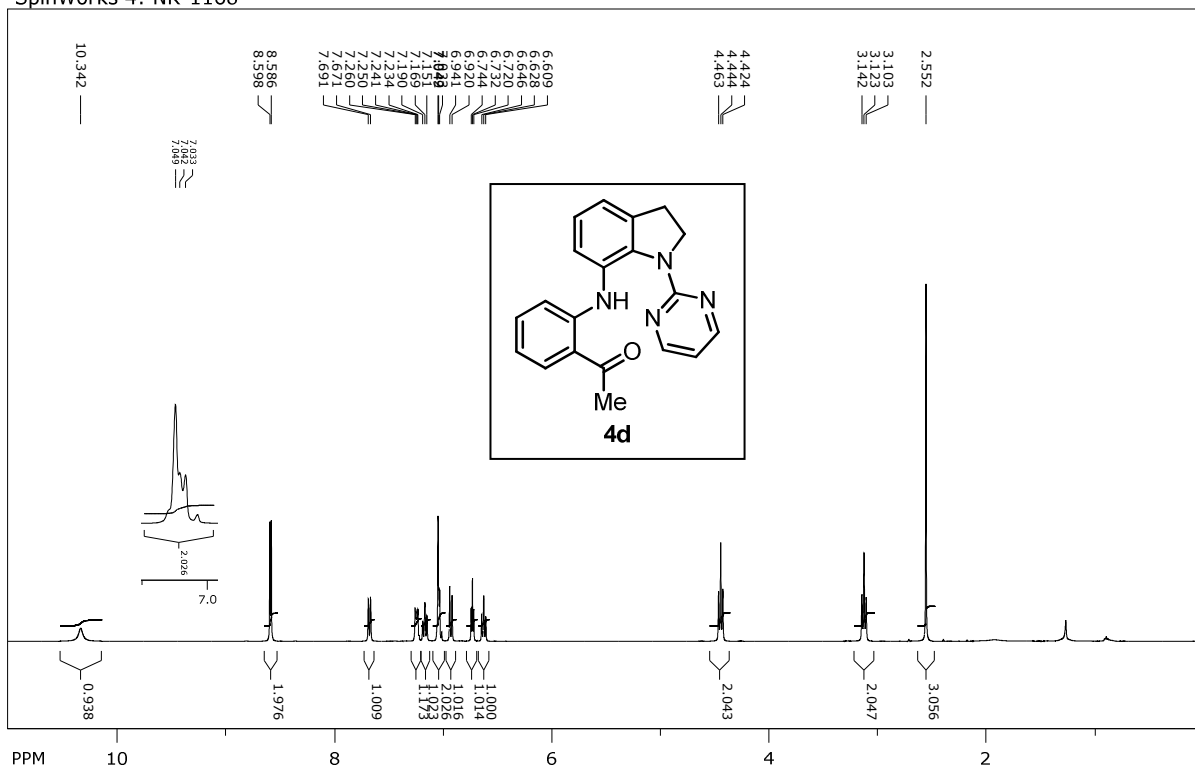

SpinWorks 4: NK-1168

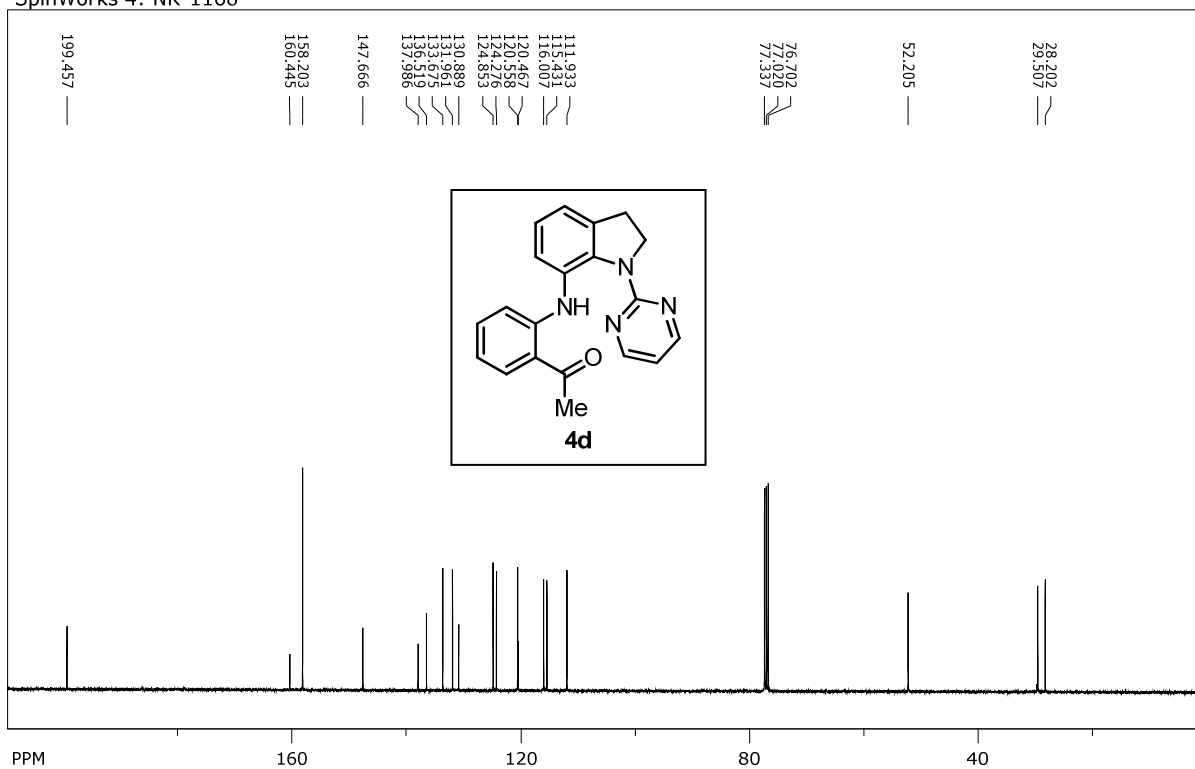



SpinWorks 3: JIN.212

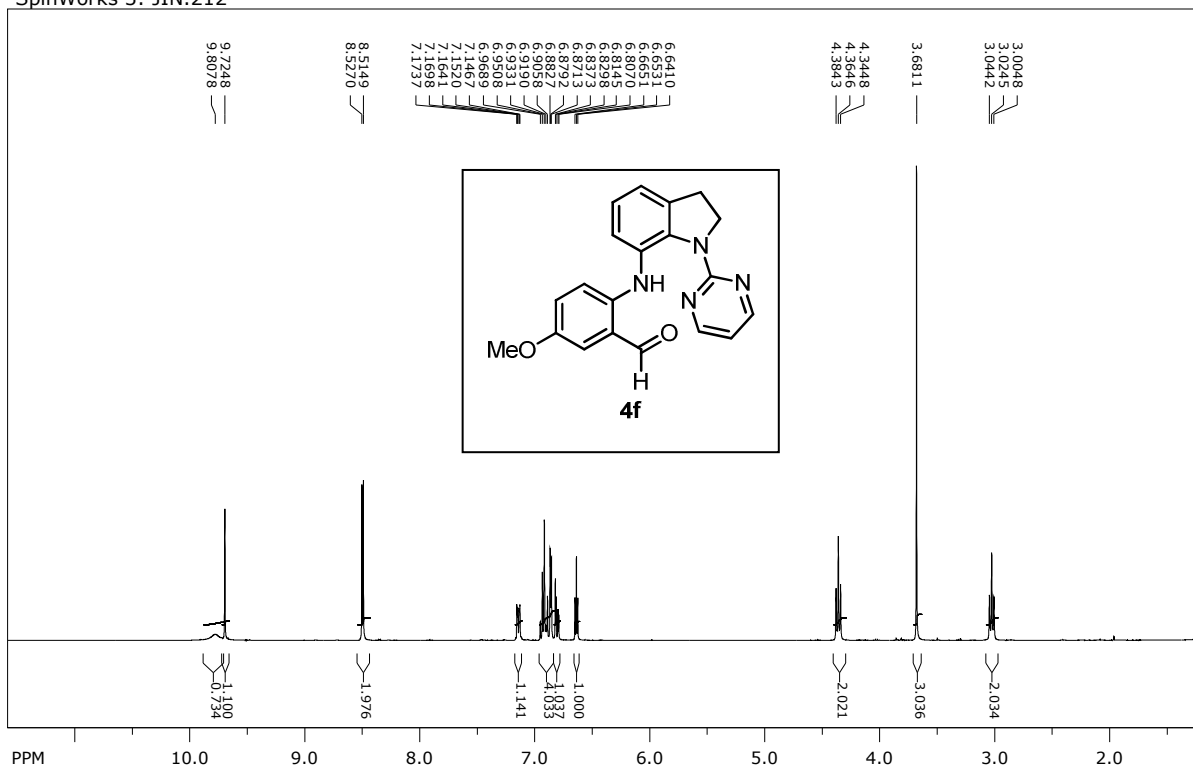

SpinWorks 3: JIN.212

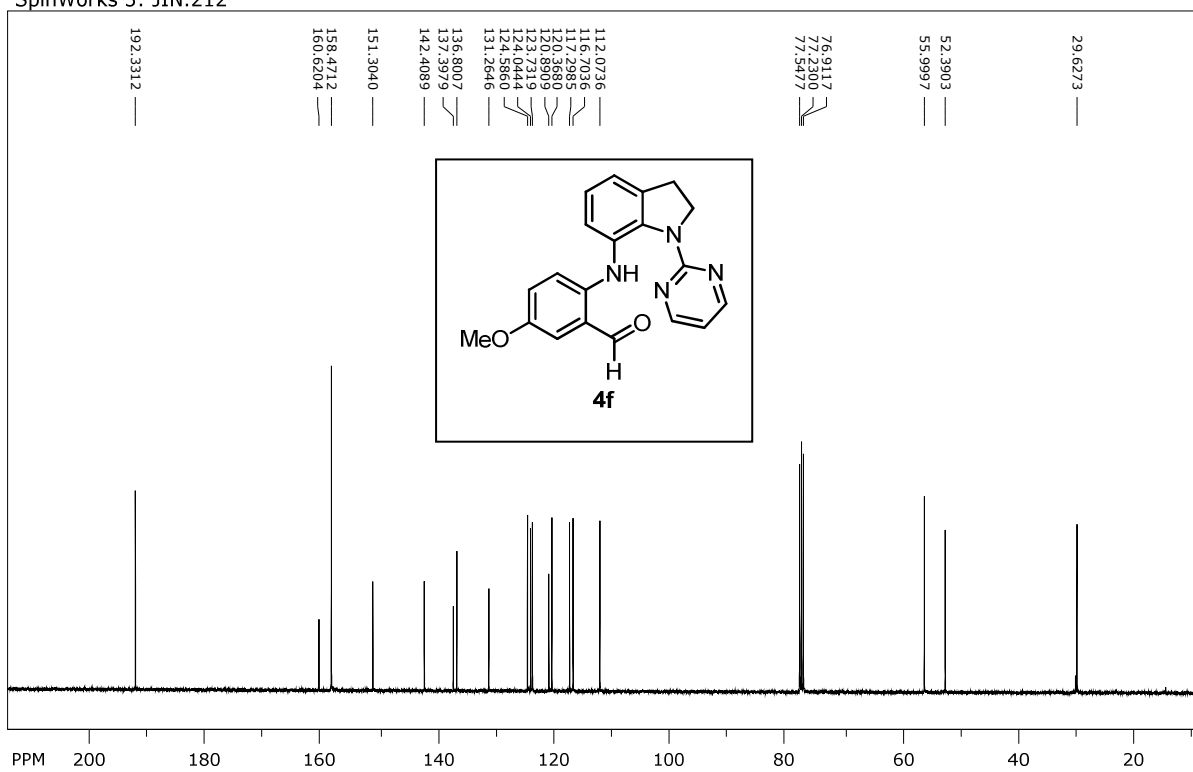

SpinWorks 4: NK-1172

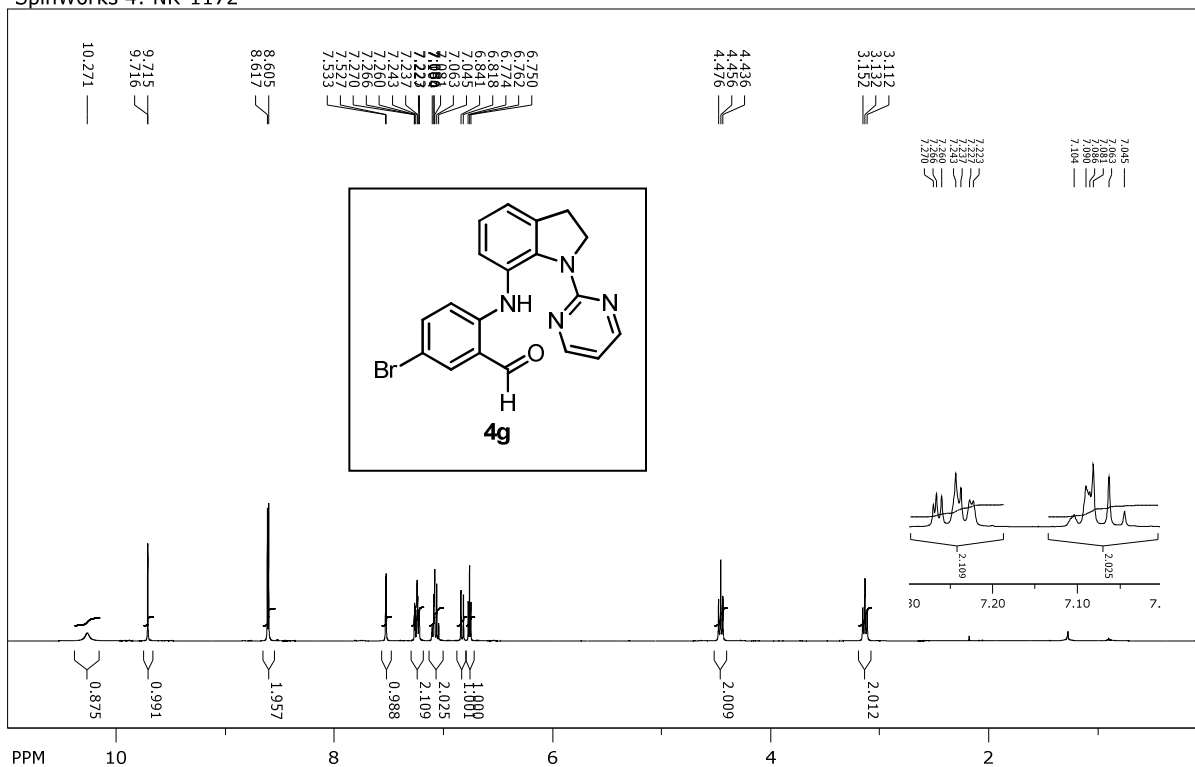

SpinWorks 4: NK-1172

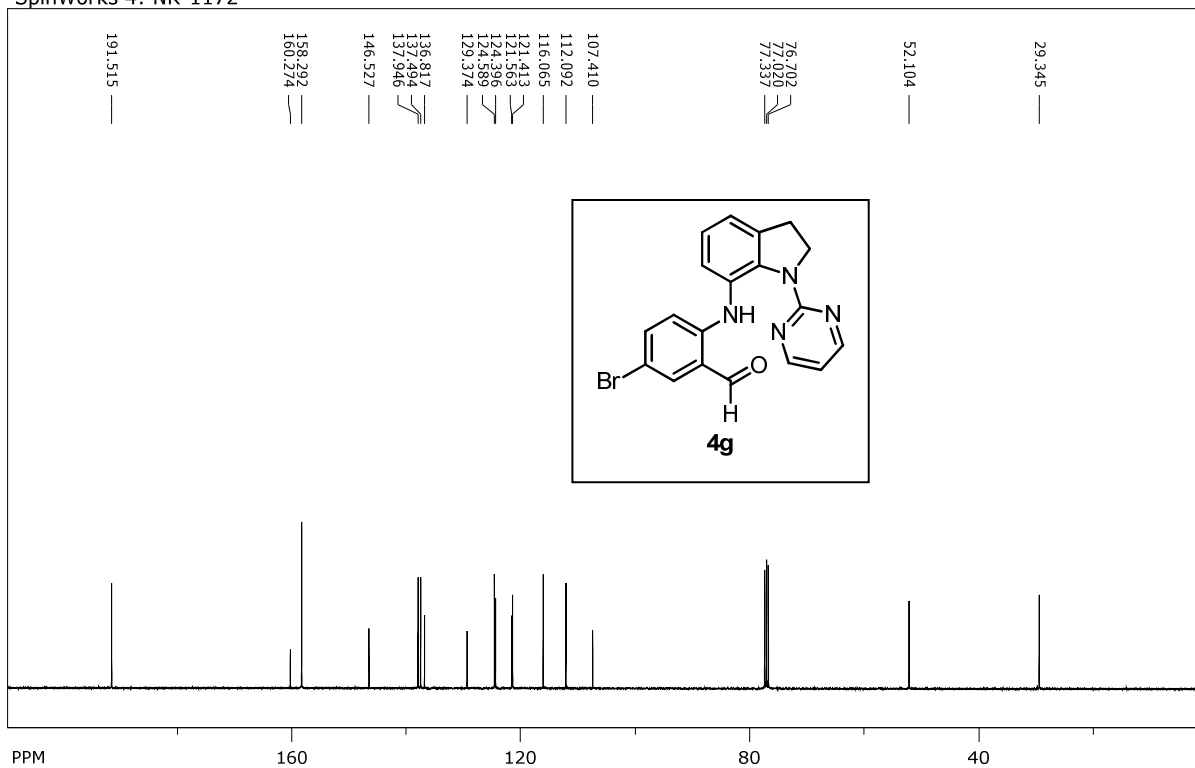

SpinWorks 4: NK-1169

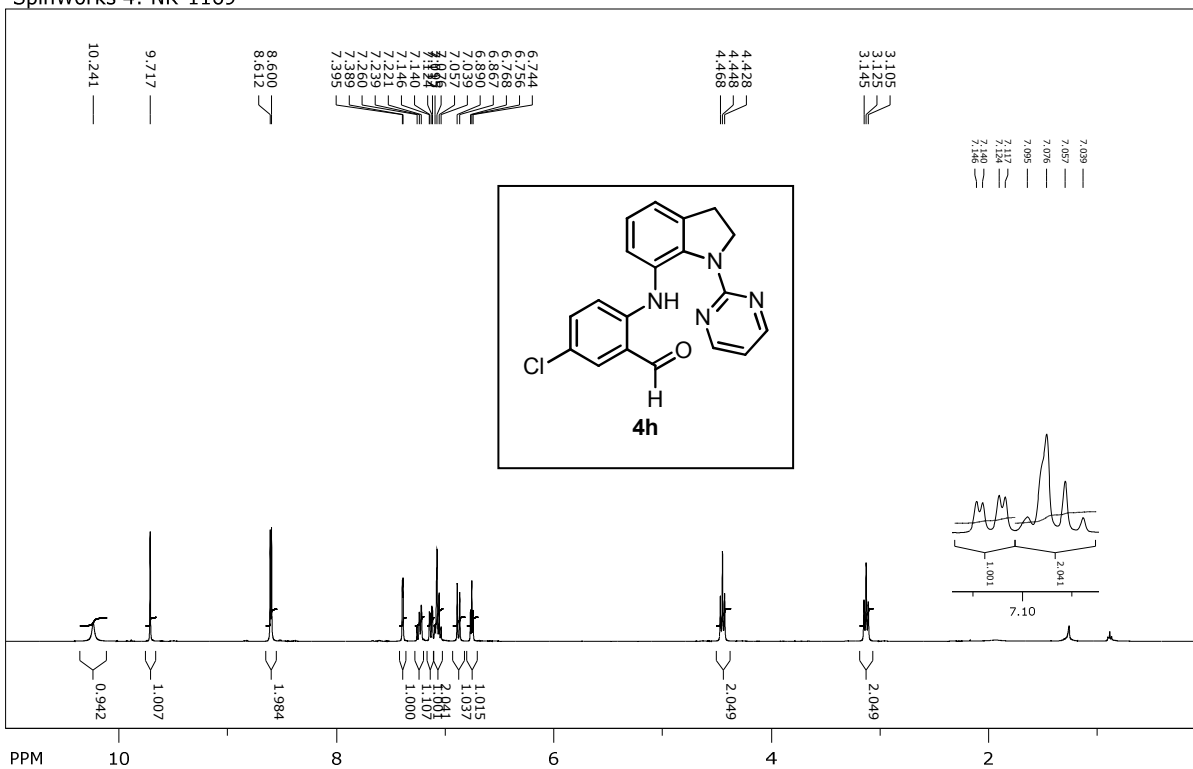

SpinWorks 4: NK-1169

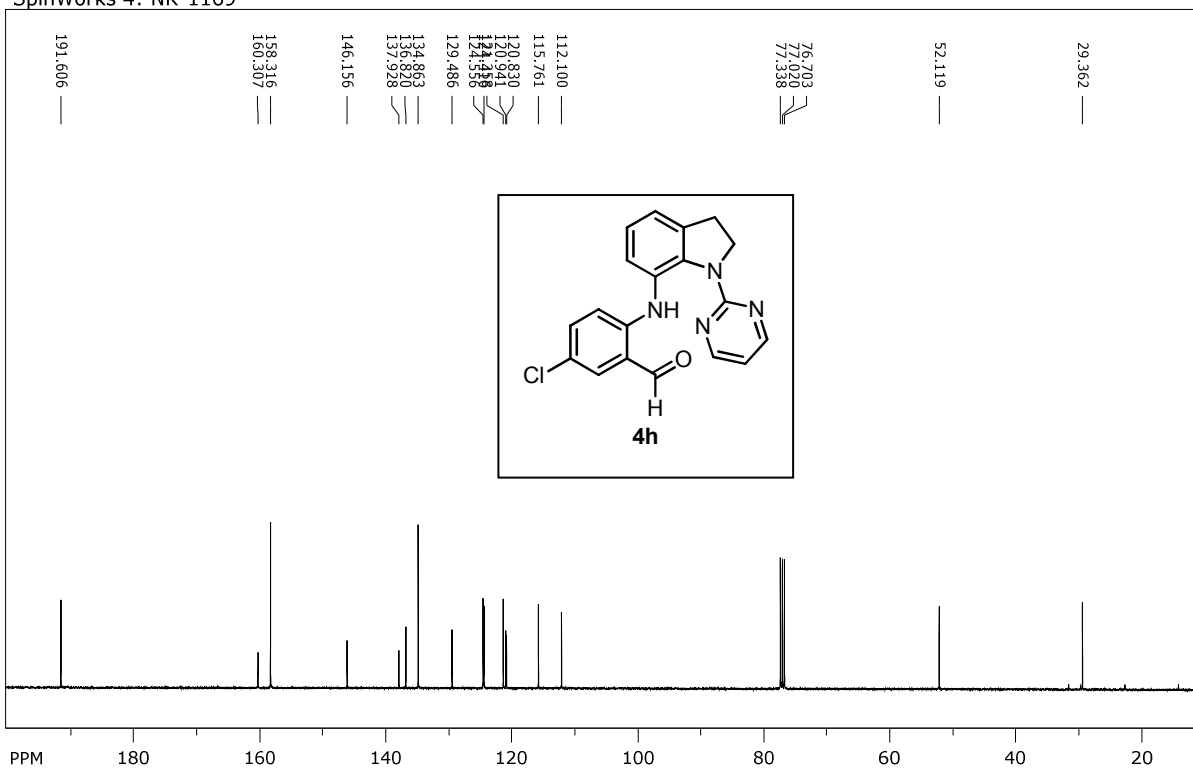



SpinWorks 4: NK-1170

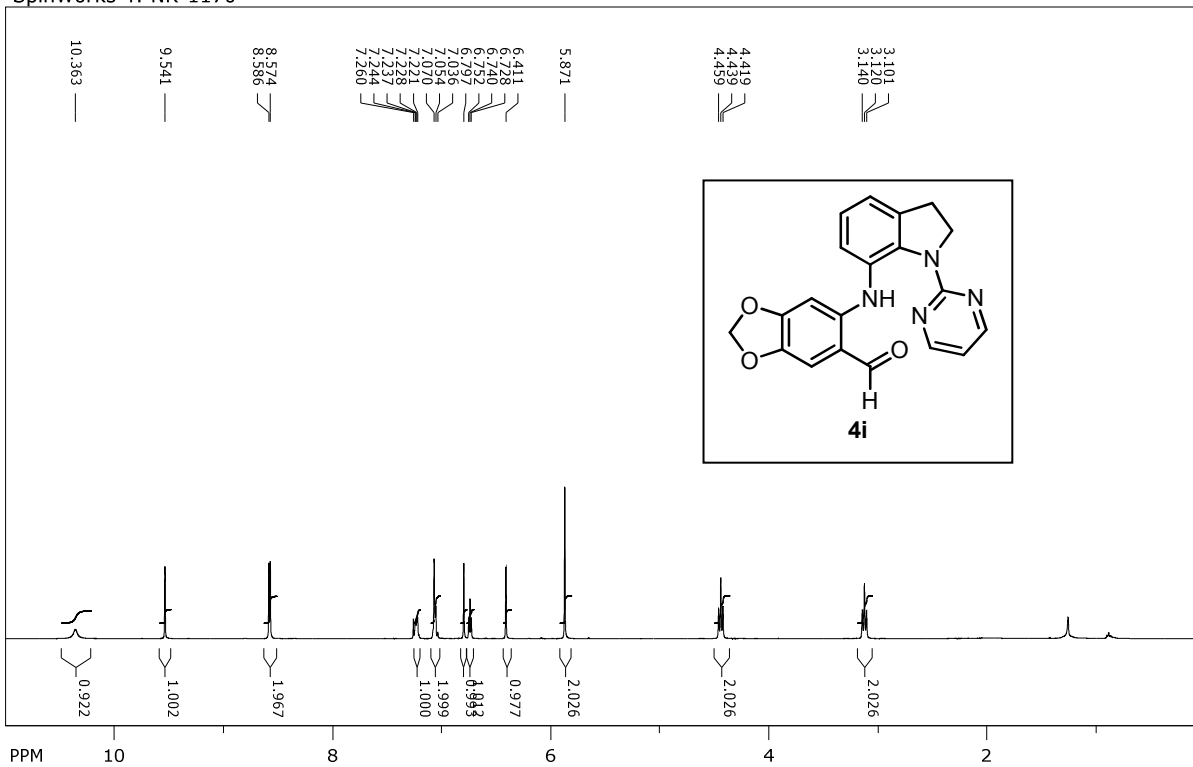

SpinWorks 4: NK-1170

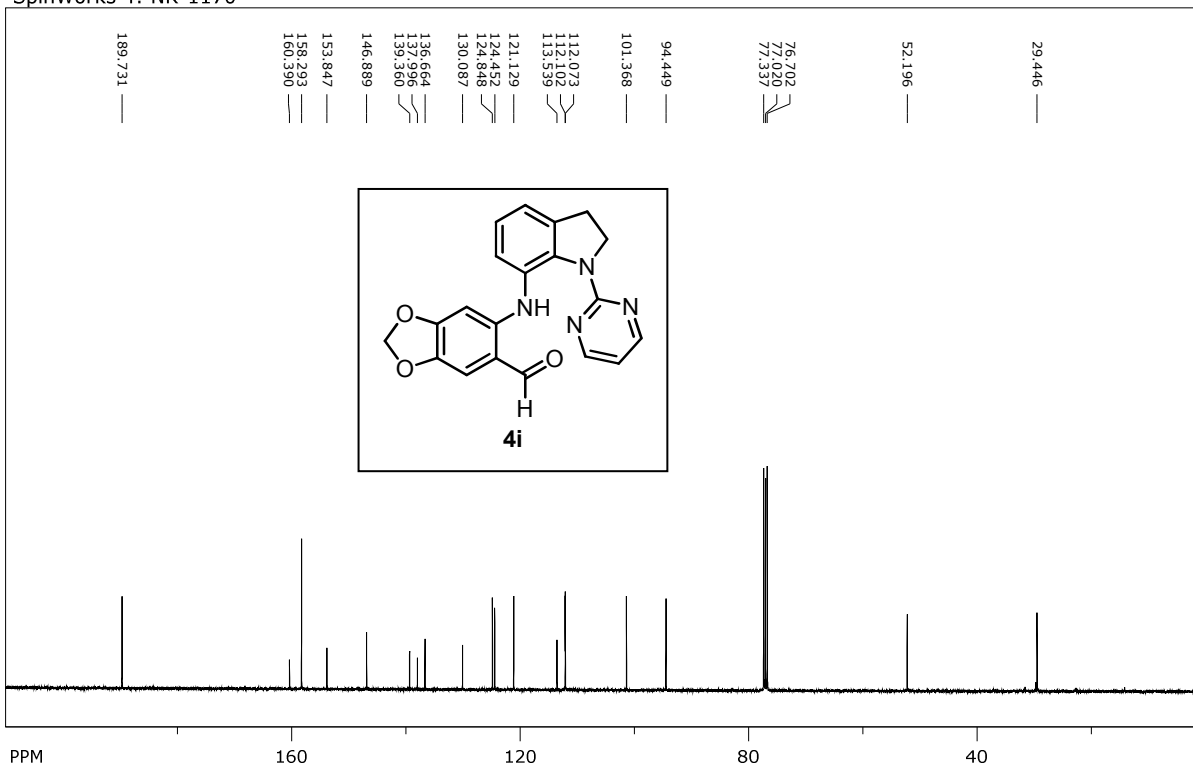

SpinWorks 4: JIN-208

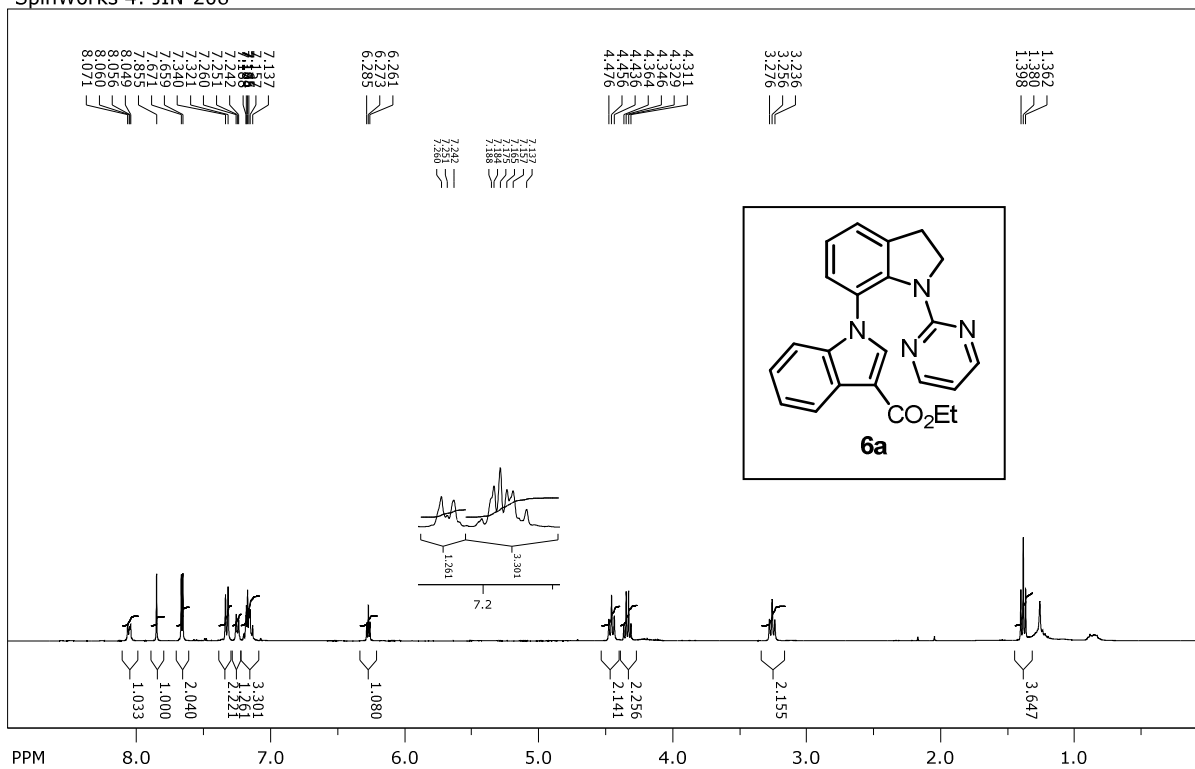

SpinWorks 3: JIN-208

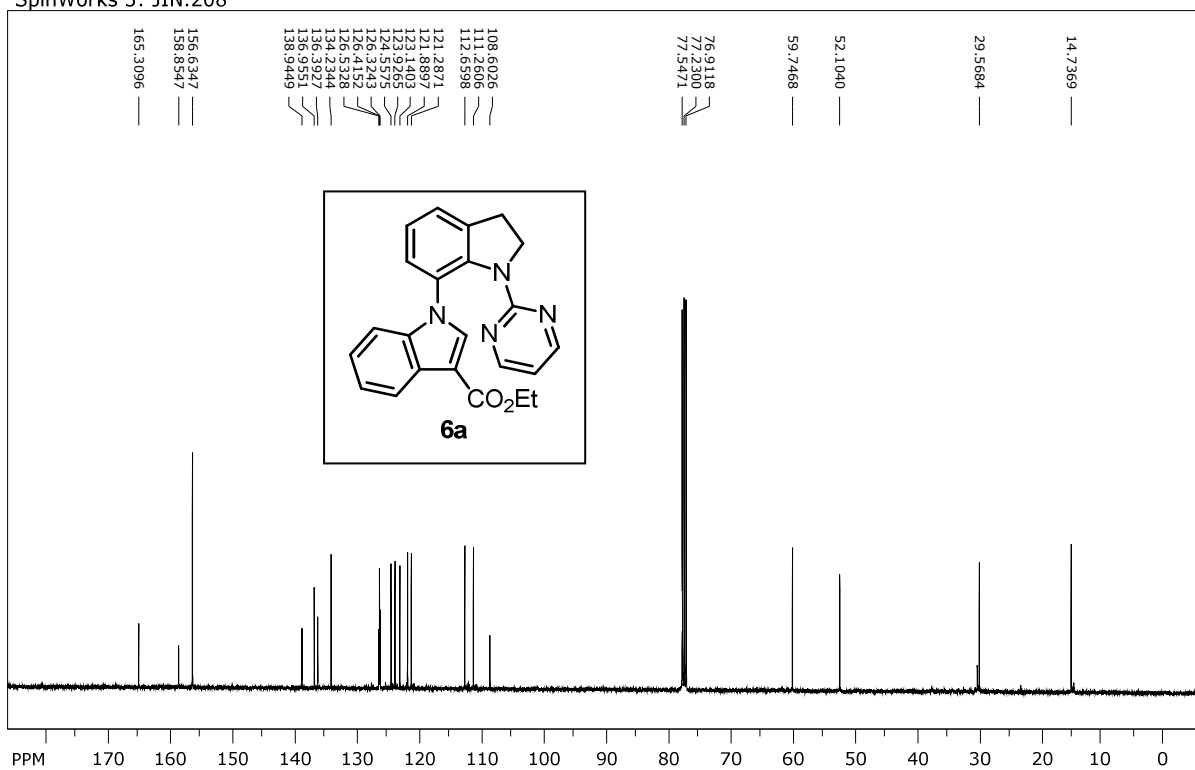

SpinWorks 3: JIN.214

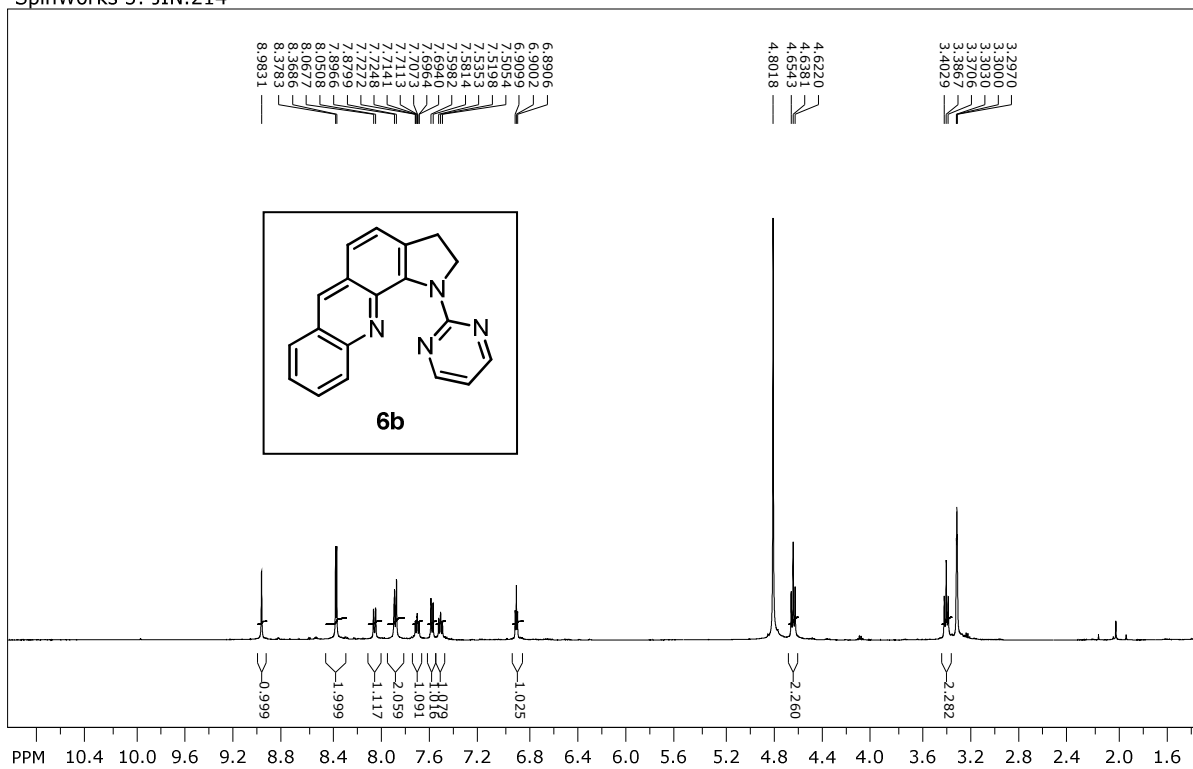

SpinWorks 3: JIN.214

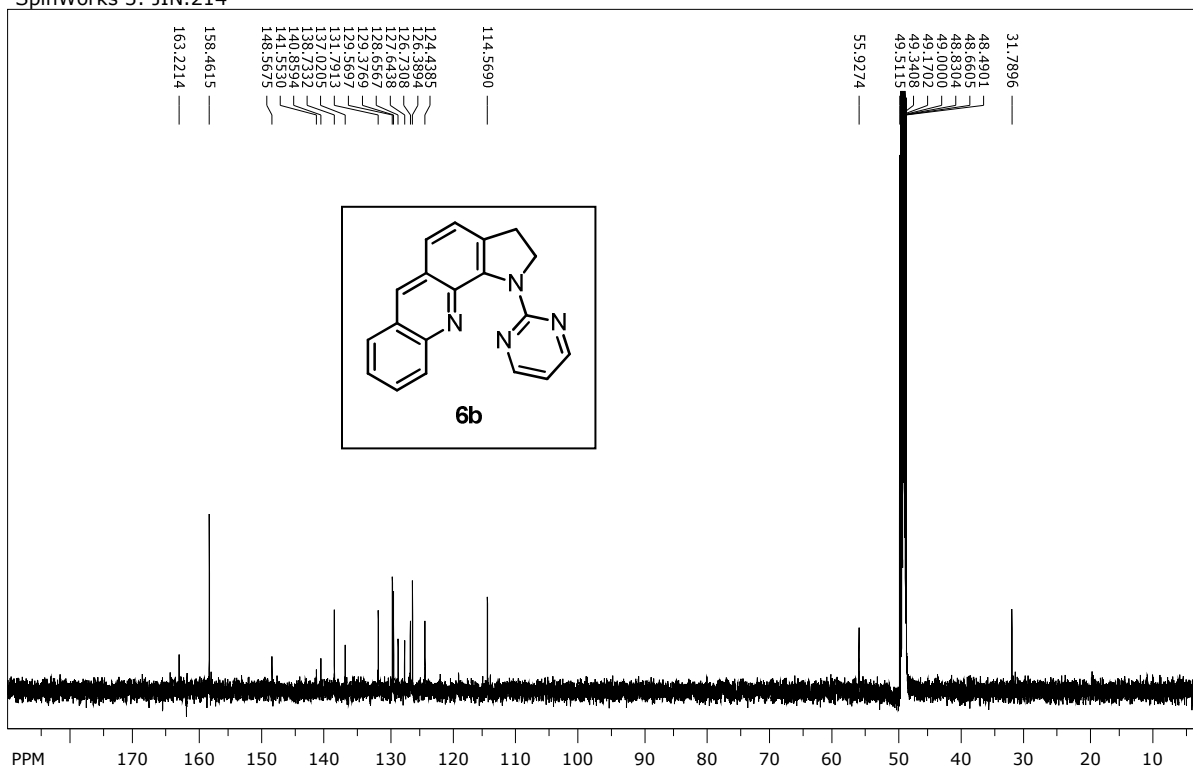

SpinWorks 3: JIN.221-3

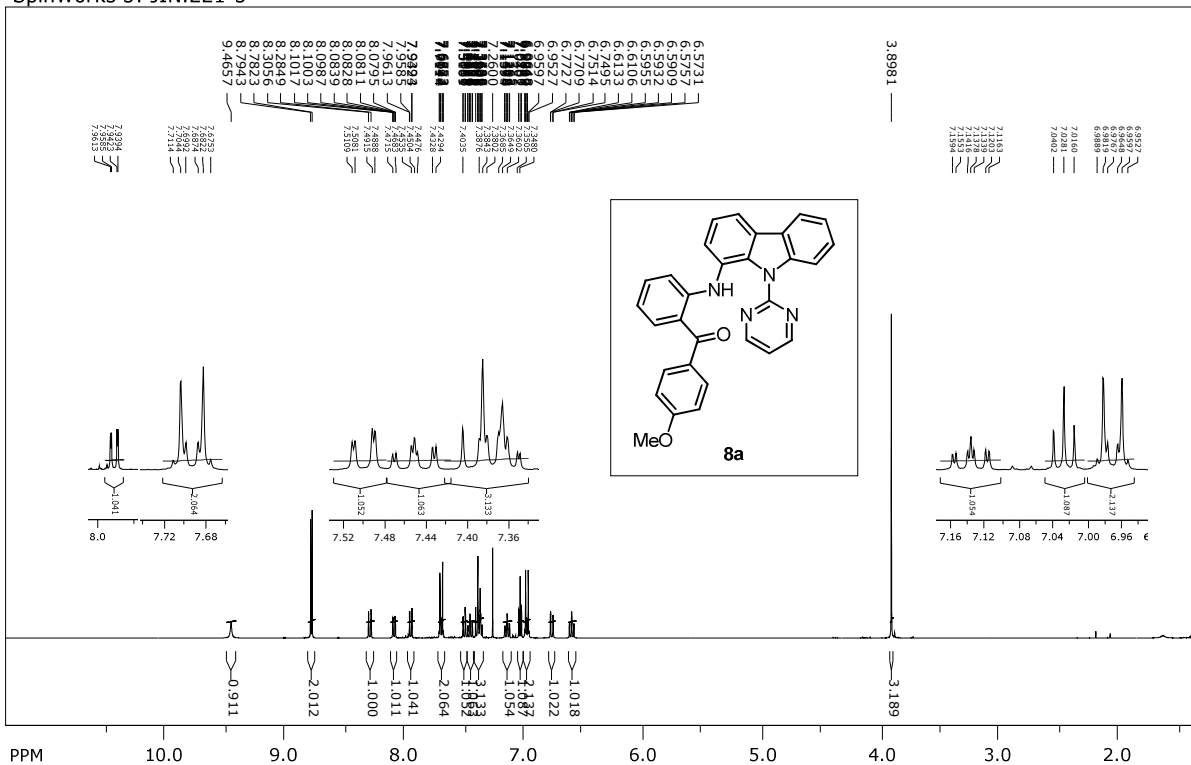

SpinWorks 3: JIN.221-3

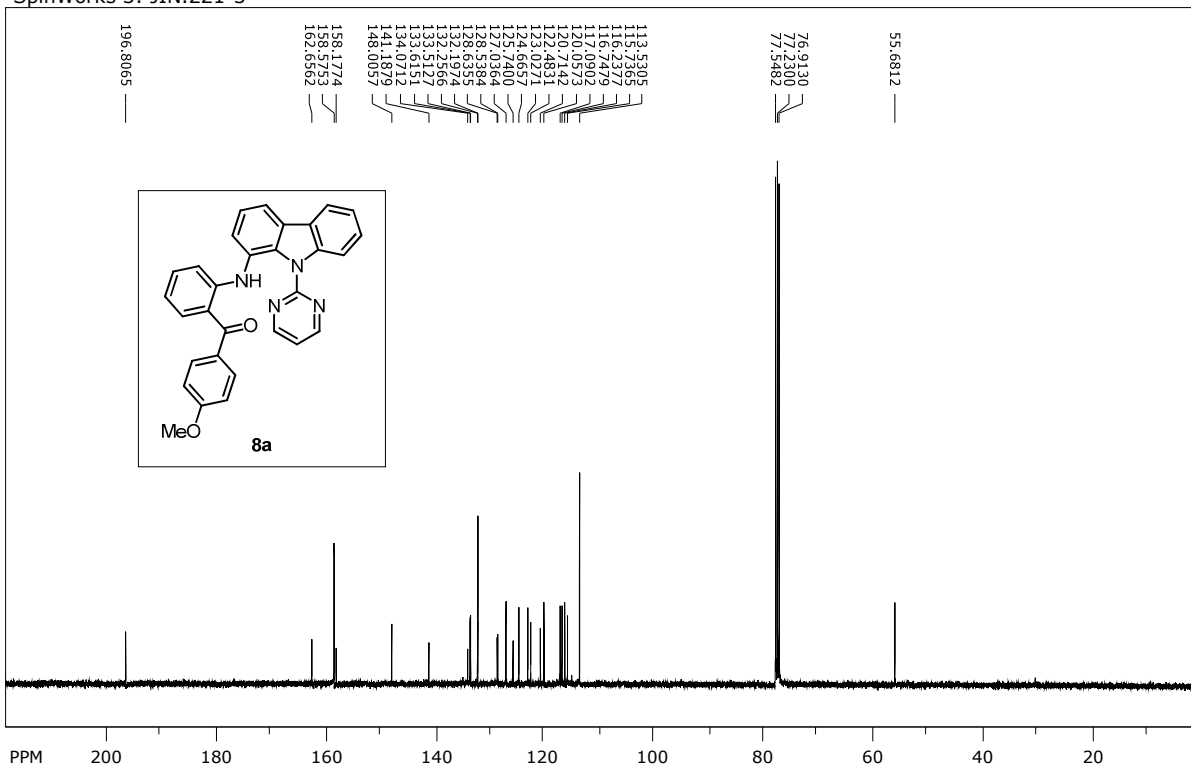

SpinWorks 3: JIN.221-5

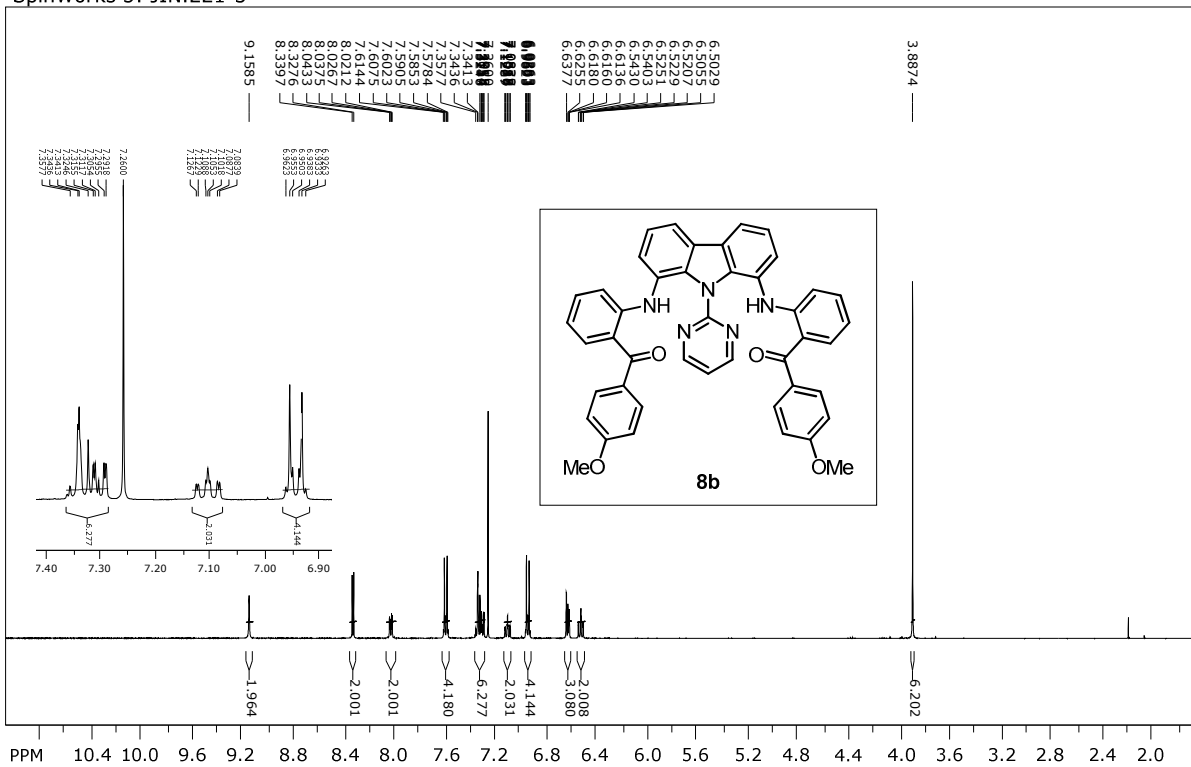

SpinWorks 3: JIN.221-5

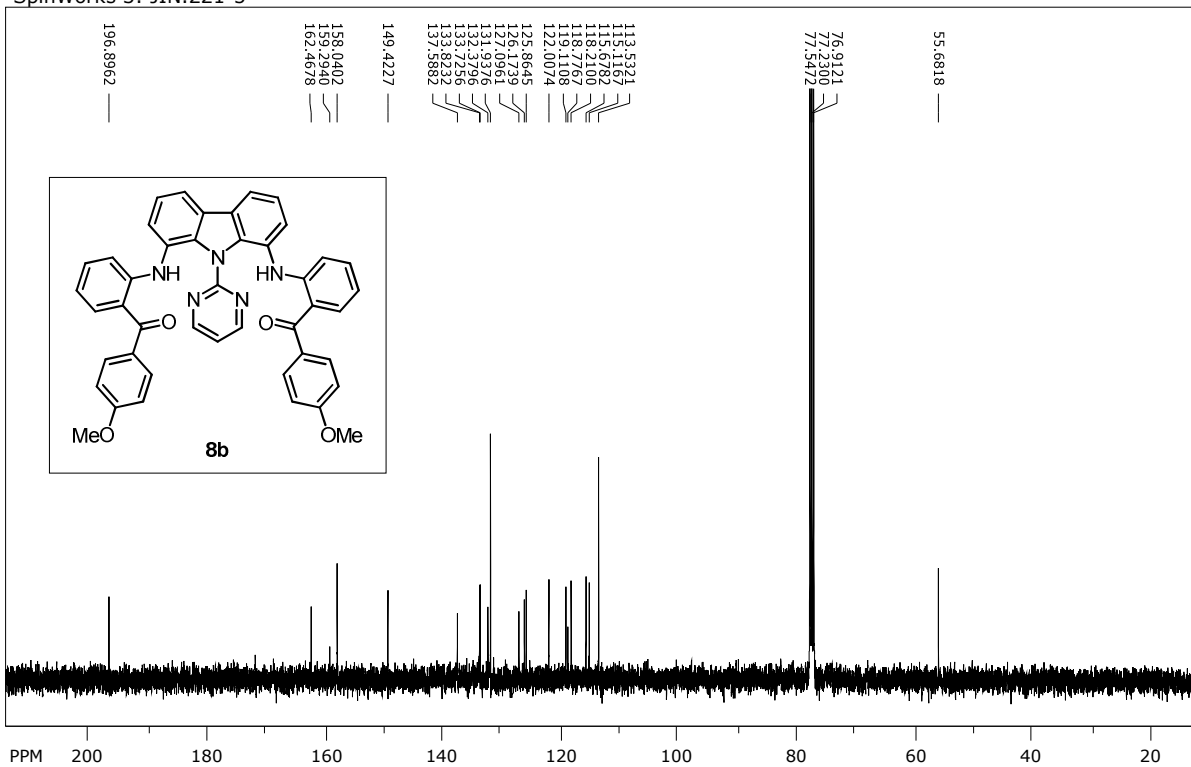

SpinWorks 4: NK1184

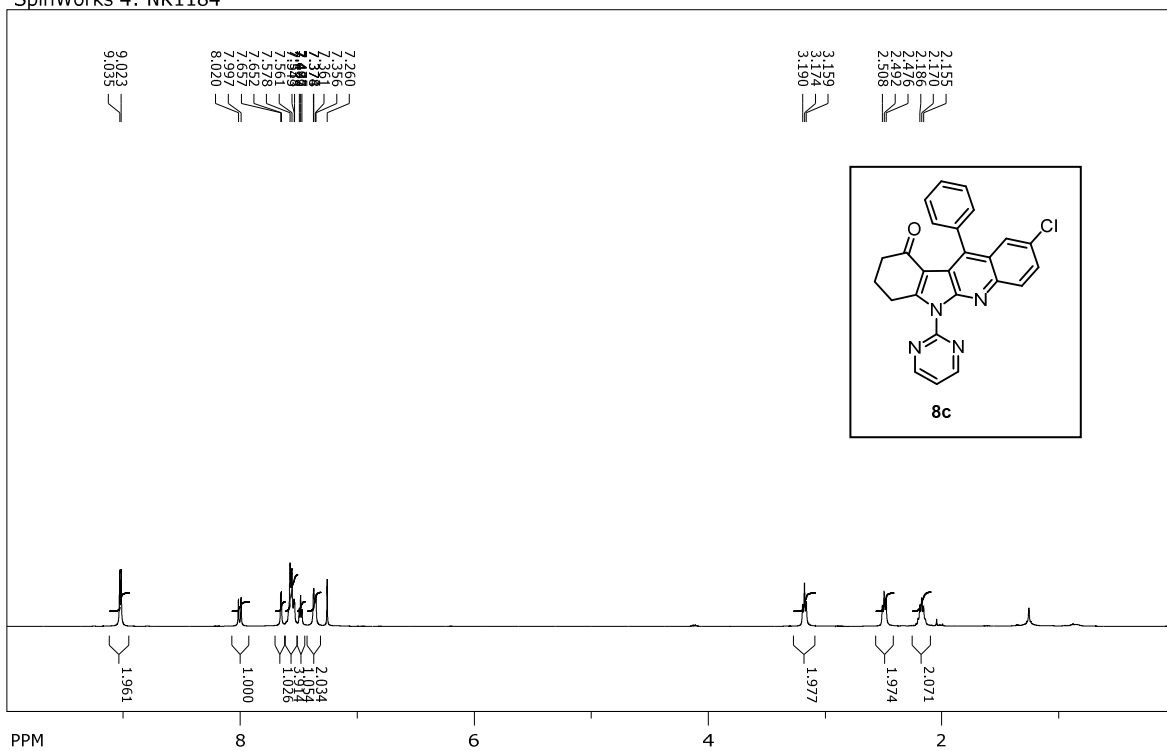

SpinWorks 4: NK1184

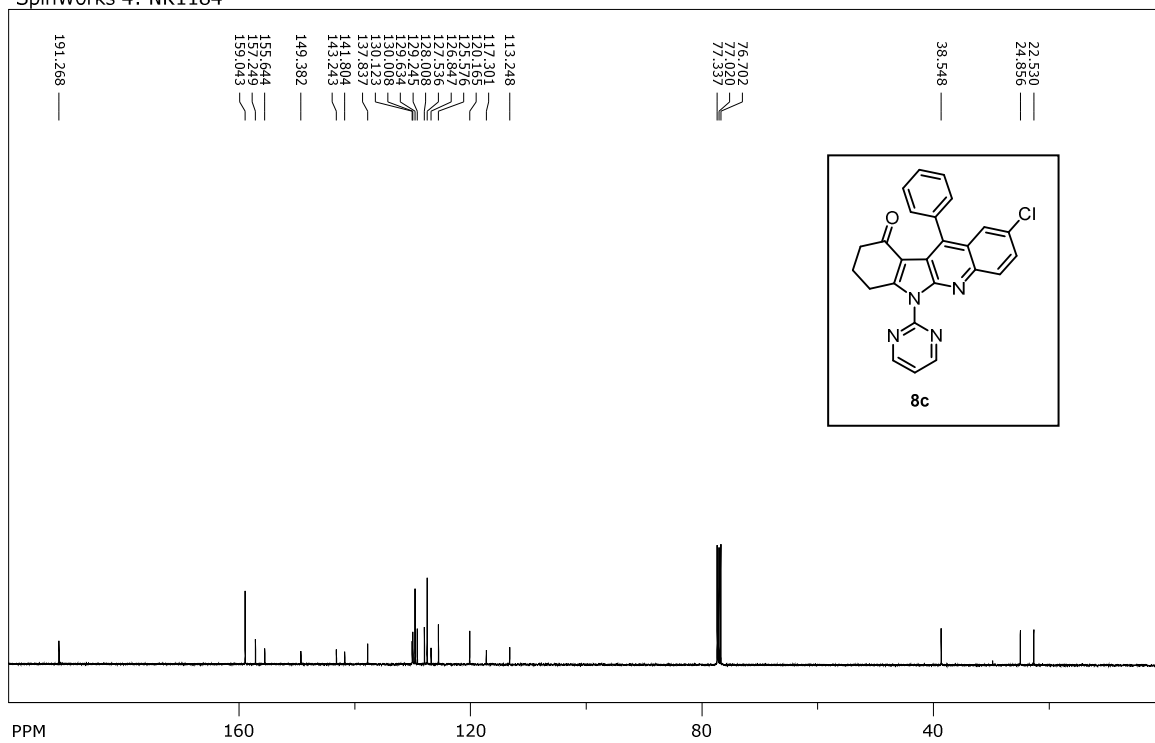

SpinWorks 3: Rh(III) complex I

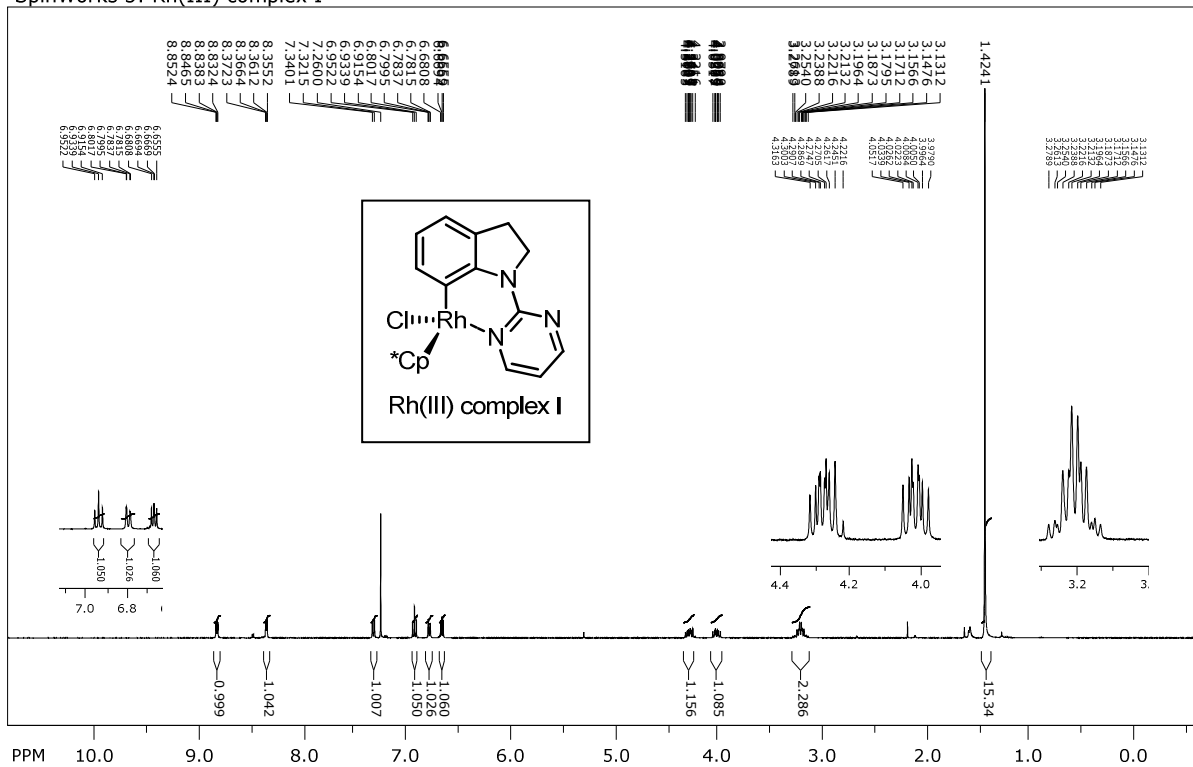

SpinWorks 3: Rh(III) complex I

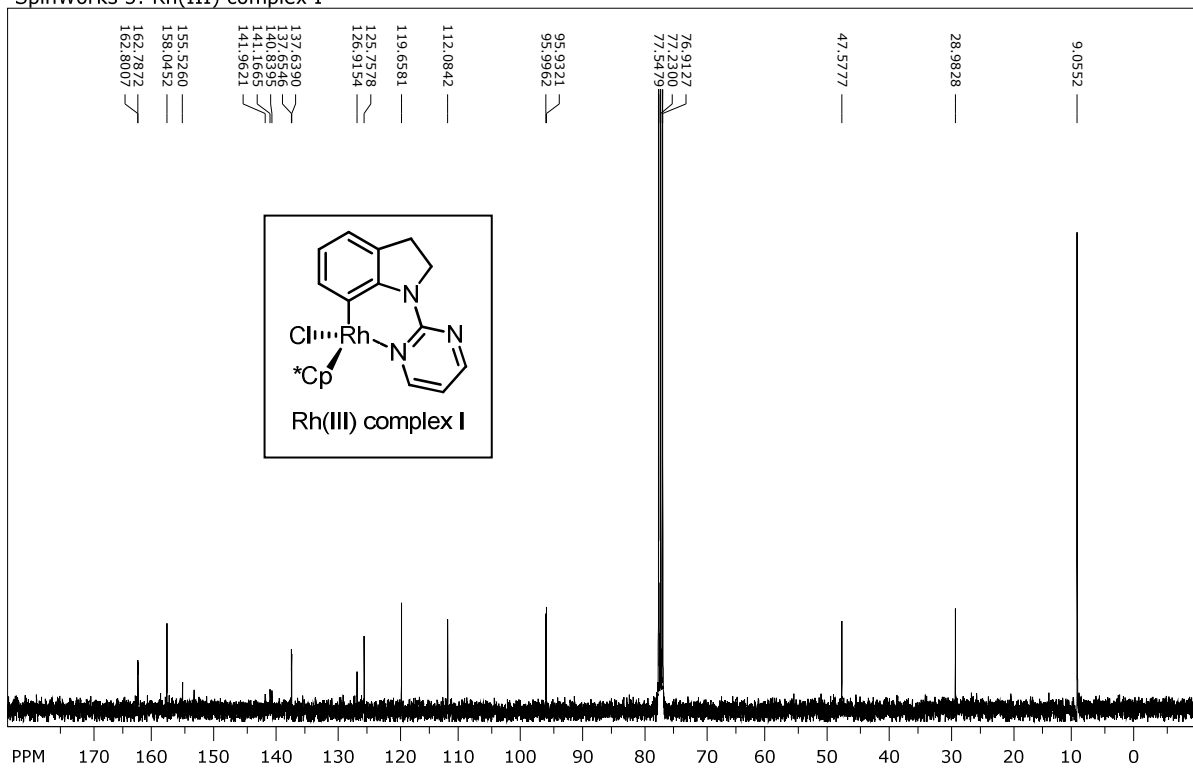

Supplement: c6qo00714g1.pdf [file c6qo00714g1.pdf]
